# Supplementary material for: Kukhtin–Ramirez-Reaction-Inspired Deprotection of Sulfamidates for the Synthesis of Amino Sugars
Source: MDPI journal article supplement (doi:10.3390/molecules28010182), 2022-12-25
Supplement: s1 [file s1]

## Supporting Information

### Kukhtin-Ramirez Reaction Inspired Deprotection of Sulfamidates for the Synthesis of Amino Sugars

Ting Li <sup>1,#</sup>, Bingbing Xu <sup>1,#</sup>, Dengxian Fu <sup>1</sup>, Qian Wan <sup>1</sup>, and Jing Zeng <sup>1,2\*</sup>

<sup>1</sup> Hubei Key Laboratory of Natural Medicinal Chemistry and Resource Evaluation, School of Pharmacy, Huazhong University of Science and Technology, Wuhan 430030, China

<sup>2</sup> Shandong Provincial Key Laboratory of Carbohydrate Chemistry and Glycobiology, Shandong University, Qingdao 266237, China

# T.L. and B.X. contributed equally

\* Corresponding Authors

### Table of Contents

|                                                       |    |
|-------------------------------------------------------|----|
| 1. Preparation of Disaccharides 1a-1m.....            | S2 |
| 2. Preparation of non-sugar substrates 6a-6b.....     | S2 |
| 3. Preparation of 1,2-dicarbonyl compounds S3-S5..... | S4 |
| 4. Screening of other 1,2-dicarbonyl compounds.....   | S6 |
| 5. Reference.....                                     | S7 |
| 6. Copies of NMR spectra.....                         | S8 |

## 1. Preparation of Disaccharides 1a-1m

Disaccharides **1a-1m** were prepared according to our previously reported procedures and their analytical data were in accordance with that previously described [1].

## 2. Preparation of non-sugar substrates 6a-6b

### Preparation of (-)-4,5 $\beta$ -(cholest-5-enyl)-1,2,3-oxathiazole-2,2-dioxide (6a)

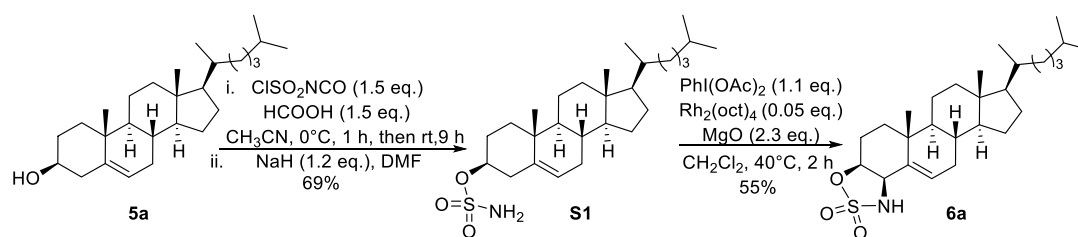

Preparation of  $\text{ClSO}_2\text{NH}_2$  solution (2 M in MeCN): Formic acid (392  $\mu\text{L}$ , 4.50 mmol) was added dropwise to neat  $\text{ClSO}_2\text{NCO}$  (170  $\mu\text{L}$ , 4.50 mmol) at  $0^\circ\text{C}$  with rapid stirring. After vigorously stirring for 5 min at  $0^\circ\text{C}$ , MeCN (2.3 mL,  $C = 2.0$  M) was added, and the reaction stirred for 1 h at  $0^\circ\text{C}$  then room temperature overnight.

Sulfamate ester formation: A 50 mL round-bottom flask equipped with stir bar and rubber septum was charged with 60%  $\text{NaH}$  (144.0 mg, 3.60 mmol) and DMF (3.0 mL,  $C = 1.0$  M) and cooled to  $0^\circ\text{C}$ . A solution of **5a** (1.2 g, 3.00 mmol) in DMF (2.4 mL,  $C = 1.25$  M) was slowly added. The reaction was stirred at room temperature for 1 h, after which it was cooled again to  $0^\circ\text{C}$ . The freshly prepared solution of  $\text{ClSO}_2\text{NH}_2$  in  $\text{CH}_3\text{CN}$  was then added dropwise via syringe, and the reaction was stirred at room temperature. Upon complete consumption of starting material as monitored by TLC, the reaction was quenched with  $\text{H}_2\text{O}$  until the mixture turned clear and then extracted with EtOAc. The organic layer was washed with water and brine, dried over  $\text{Na}_2\text{SO}_4$  and concentrated *in vacuo*. The residue was purified by silica gel chromatography to give **S1** (960.0 mg, 69%) as a white solid.

Intramolecular amination: To a solution of **S1** (400.0 mg, 0.86 mmol) in  $\text{CH}_2\text{Cl}_2$  (5.4 mL,  $C = 0.16$  M),  $\text{MgO}$  (79.8 mg, 1.98 mmol),  $\text{PhI}(\text{OAc})_2$  (306.0 mg, 0.95 mmol),

and Rh<sub>2</sub>(oct)<sub>4</sub> (33.4 mg, 0.043 mmol) were added sequentially. The suspension was stirred vigorously for 2 h at 40 °C. The reaction was cooled to room temperature, diluted with CH<sub>2</sub>Cl<sub>2</sub> and filtered through a pad of Celite. The filter cake was rinsed with CH<sub>2</sub>Cl<sub>2</sub> and the combined filtrates were evaporated under reduced pressure. The residue was purified by silica gel chromatography to give **6a** (222.0 mg, 55%) as a white solid. R<sub>f</sub> = 0.29 (petroleum ether-EtOAc 5:1). <sup>1</sup>H NMR (400 MHz, CDCl<sub>3</sub>) δ 5.80 (app. t, *J* = 2.4 Hz, 1H), 4.72 (dt, *J* = 10.8, 6.0 Hz, 1H), 4.50 (t, *J* = 5.6 Hz, 1H), 4.30 (d, *J* = 4.8 Hz, 1H), 2.25 (dq, *J* = 14.0, 3.2 Hz, 1H), 2.12 (dt, *J* = 18.0, 4.4 Hz, 1H), 2.06-1.99 (m, 2H), 1.89 (dt, *J* = 14.0, 4.0 Hz, 1H), 1.85-1.77 (m, 1H), 1.64-1.43 (m, 7H), 1.41-1.22 (m, 5H), 1.18 (s, 3H), 1.15-1.03 (m, 6H), 1.00-0.93 (m, 2H), 0.89 (d, *J* = 6.4 Hz, 3H), 0.84 (dd, *J* = 6.4, 1.6 Hz, 6H), 0.67 (s, 3H). Analytical data for **6a** was essentially the same as those reported previously [2].

### Preparation of 3-(N-Boc-Indolyl)-1,2,3-oxathiazole-2,2-dioxide (**6b**)

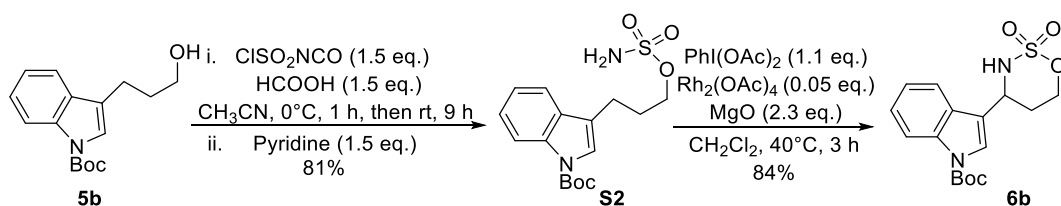

Formic acid (0.30 mL, 8.13 mmol) was added dropwise to neat ClSO<sub>2</sub>NCO (0.70 μL, 8.13 mmol) at 0 °C with rapid stirring. After vigorously stirring for 5 min at 0 °C, CH<sub>2</sub>Cl<sub>2</sub> (8.1 mL, C = 1.0 M) was added, and the reaction stirred for 1 h at 0 °C then room temperature overnight. After cooled to 0 °C, a solution of **5b** (1.49 g, 5.42 mmol) and pyridine (0.65 mL, 8.13 mmol) in CH<sub>2</sub>Cl<sub>2</sub> (10.8 mL, C = 0.5 M) was slowly added. The reaction was then stirred at room temperature. Upon complete consumption of starting material as monitored by TLC, the reaction was quenched with H<sub>2</sub>O until the mixture turned clear and then extracted with EtOAc. The organic layer was washed with water and brine, dried over Na<sub>2</sub>SO<sub>4</sub> and concentrated *in vacuo*. The residue was purified by silica gel chromatography to give **S2** (1.56 g, 81%) as a white solid.

To a solution of **S2** (886.0 mg, 2.5 mmol) in CH<sub>2</sub>Cl<sub>2</sub> (12.5 mL, C = 0.2 M), MgO (231.7 mg, 7.75 mmol), PhI(OAc)<sub>2</sub> (913.3 mg, 2.75 mmol), and Rh<sub>2</sub>(OAc)<sub>4</sub> (55.0 mg, 0.125 mmol) were added sequentially. The suspension was stirred vigorously for 2 h at 40 °C. The reaction was cooled to room temperature, diluted with CH<sub>2</sub>Cl<sub>2</sub>, and filtered through a pad of Celite. The filter cake was rinsed with CH<sub>2</sub>Cl<sub>2</sub> and the combined filtrates were evaporated under reduced pressure. The residue was purified by silica gel chromatography to give **6b** (739.0 mg, 84%) as a white solid. White solid. *R<sub>f</sub>* = 0.46 (petroleum ether-EtOAc 3:1). <sup>1</sup>H NMR (400 MHz, CDCl<sub>3</sub>) δ 8.10 (d, *J* = 8.0 Hz, 1H, Ar-H), 7.70 (d, *J* = 7.6 Hz, 1H, Ar-H), 7.54 (s, 1H, C=CH), 7.37-7.32 (m, 1H, Ar-H), 7.28-7.26 (m, 1H, Ar-H), 5.14 (td, *J* = 11.2, 2.0 Hz, 1H), 4.92 (td, *J* = 12.4, 2.4 Hz, 1H), 4.65 (ddd, *J* = 11.6, 4.8, 1.6 Hz, 1H), 4.25 (d, *J* = 10.0 Hz, 1H), 2.42-2.29 (m, 1H), 2.16-2.11 (m, 1H), 1.65 (s, 9H, C(CH<sub>3</sub>)<sub>3</sub>). Analytical data for **6b** was essentially the same as those reported previously [3].

### 3. Preparation of 1,2-dicarbonyl compounds

#### Preparation of N,N-diethyl-2-oxo-2-phenylacetamide (**S3**)

To a solution of phenylglyoxylic acid (100 mg, 0.67 mmol) and DABCO (75.2 mg, 0.67 mmol) in dry DCE (6.7 mL, C = 0.1 M) was added diethylcarbonyl chloride (127 μL, 1.00 mmol). The reaction mixture was stirred at 60 °C for 12 h. After the reaction was completed, the mixture was neutralized with saturated Na<sub>2</sub>CO<sub>3</sub> and then extracted with CH<sub>2</sub>Cl<sub>2</sub>. The organic layer was washed with water and brine, dried over Na<sub>2</sub>SO<sub>4</sub> and concentrated *in vacuo*. The residue was purified by silica gel chromatography to give **S3** (129 mg, 94%) as yellow oil. *R<sub>f</sub>* = 0.33 (petroleum ether-EtOAc 2:1). <sup>1</sup>H NMR (400 MHz, CDCl<sub>3</sub>) δ 7.93-7.90 (m, 2H, Ar-H), 7.63-7.60 (m, 1H, Ar-H), 7.51-7.46 (m, 2H, Ar-H), 3.54 (q, *J* = 7.2 Hz, 2H, CH<sub>2</sub>), 3.22 (q, *J* = 7.2 Hz, 2H, CH<sub>2</sub>), 1.27 (t, *J* = 7.2 Hz, 3H, Me), 1.14 (t, *J* = 7.2 Hz, 3H, Me). Analytical data for **S3** were essentially the same as those reported previously [4].

### 1-Methyl-1H-indole-2,3-dione (S4)

Isatin (100.0 mg, 0.68 mmol) was dissolved in DMF (1.4 mL, C = 0.5 M) at 0 °C, and sodium hydride (32.6 mg, 0.82 mmol, 60%) was added slowly into the mixture. After stirred for 30 min, CH<sub>3</sub>I (50 µL, 0.82 mmol) was added slowly, and the mixture was stirred for 2 h at 0 °C and then 1 h at room temperature. After being quenched with saturated NaHCO<sub>3</sub>, the mixture was extracted with EtOAc. The organic layer was washed with water and brine, dried over Na<sub>2</sub>SO<sub>4</sub> and concentrated *in vacuo*. The residue was purified by silica gel chromatography to give **S4** (107 mg, 98%) as a red solid. *R<sub>f</sub>* = 0.33 (petroleum ether-EtOAc 2:1). <sup>1</sup>H NMR (400 MHz, CDCl<sub>3</sub>) δ 7.60-7.54 (m, 2H, Ar-H), 7.09 (t, *J* = 7.6 Hz, 1H, Ar-H), 6.87 (d, *J* = 8.0 Hz, 1H, Ar-H), 3.22 (s, 3H, Me). Analytical data for **S4** were essentially the same as those reported previously [5].

### 1-Tosylindoline-2,3-dione (S5)

Isatin (100.0 mg, 0.68 mmol) was dissolved in CH<sub>2</sub>Cl<sub>2</sub> (1.0 mL, C = 0.7 M) at 0 °C under Ar atmosphere, and Et<sub>3</sub>N (104 µL, 0.75 mmol) was added. After stirred for 20 min, tosyl chloride (129.6 mg, 0.68 mmol) was added, and the mixture was stirred for 1 h at 0 °C and then 3 h at room temperature. The solvent was removed under reduced pressure, and the residue was washed with CH<sub>3</sub>OH to give N-Tosyl protected isatin **S5** (103 mg, 50%) as a yellow solid. *R<sub>f</sub>* = 0.23 (petroleum ether-acetone 3:1). <sup>1</sup>H NMR (400 MHz, DMSO-*d*<sub>6</sub>) δ 7.97 (d, *J* = 8.4 Hz, 2H, Ar-H), 7.86 (d, *J* = 8.4 Hz, 1H, Ar-H), 7.76 (td, *J* = 7.6, 1.2 Hz, 1H, Ar-H), 7.68 (dd, *J* = 7.6, 1.2 Hz, 1H, Ar-H), 7.48 (d, *J* = 8.0 Hz, 2H, Ar-H), 7.32 (td, *J* = 7.6, 0.8 Hz, 1H, Ar-H), 2.40 (s, 3H, Me). Analytical data for **S5** were essentially the same as those reported previously [6].

#### 4. Screening of other 1,2-dicarbonyl compounds

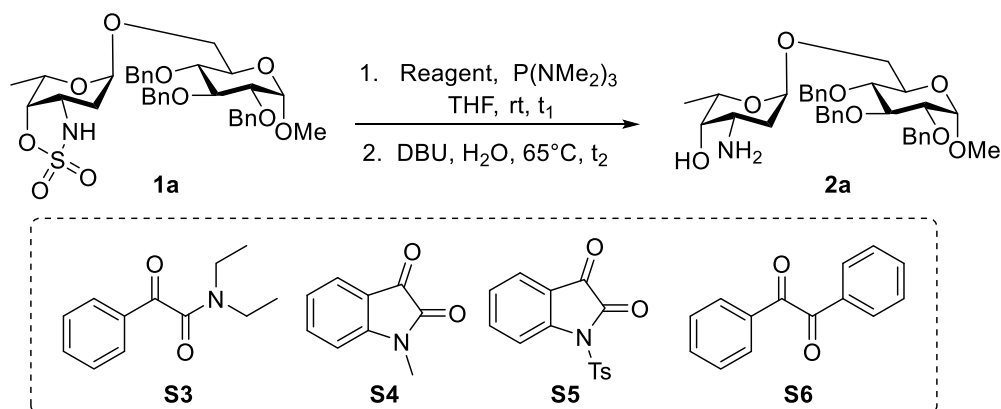

| Entry | Reagent             | $\text{P}(\text{NMe}_2)_3$ | $t_1$ | DBU     | $t_2$     | Yield of <b>2b</b> |
|-------|---------------------|----------------------------|-------|---------|-----------|--------------------|
| 1     | <b>S3</b> (1.1 eq.) | 1.2 eq.                    | 1.5 h | /       | /         | N.R.               |
| 2     | <b>S4</b> (1.1 eq.) | 1.2 eq.                    | 1.5 h | /       | /         | N.R.               |
| 3     | <b>S5</b> (1.1 eq.) | 1.2 eq.                    | 1.5 h | /       | /         | N.R.               |
| 4     | <b>S6</b> (3.0 eq.) | 3.2 eq.                    | 8 h   | 3.0 eq. | overnight | <10%               |

The reaction with 1,2-dicarbonyl compounds **S3-S5** furnished Kukhtin-Ramirez adducts, but these adducts did not react with **1a** to produce N-H insertion products in the first step. In these several cases, sugar **1a** was fully recovered.

## 5. Reference

- [1] (a) Zeng, J.; Wang, R.; Yao, W.; Zhang, S.; Sun, G.; Liao, Z.; Meng, L.; Wan, Q. Diversified synthesis and  $\alpha$ -selective glycosylation of 3-amino-2,3,6-trideoxy sugars. *Org. Chem. Front.* **2018**, 5, 3391-3395. (b) Fu, D.; Zhang, S.; Xu, B.; Peng, P.; Wan, Q.; Zeng, J. Selective reduction leading to 3,5-*cis*-3-aminosugars: Synthesis and stereoselective glycosylation. *J. Org. Chem.* **2022**. DOI: 10.1021/acs.joc.2c02364 (accepted).
- [2] Paradine, S. M.; White, M. C. Iron-catalyzed intramolecular allylic C-H amination. *J. Am. Chem. Soc.* **2012**, 134, 2036-2039.
- [3] Espino, C. G.; When, P. M.; Chow, J.; Du Bois, J. Synthesis of 1,3-difunctionalized amine derivatives through selective C-H bond oxidation. *J. Am. Chem. Soc.* **2001**, 123, 6935-6936.
- [4] Zhang, X.; Wang, L. TBHP/I<sub>2</sub>-promoted oxidative coupling of acetophenones with amines at room temperature under metal-free and solvent-free conditions for the synthesis of  $\alpha$ -ketoamides. *Green Chem.* **2012**, 14, 2141-2145.
- [5] Ryu, H.; Seo, J.; Ko, H. M. Synthesis of Spiro[oxindole-3,2'-pyrrolidine] derivatives from benzyne and azomethine ylides through 1,3-dipolar cycloaddition reactions. *J. Org. Chem.* **2018**, 83, 14102-14109.
- [6] Yu, T. T.; Nizalapur, S.; Ho, K. K. K.; Yee, E.; Berry, T.; Cranfield, C. G.; Willcox, M.; Black, D. S.; Kumar, N. Design, synthesis and biological evaluation of N-sulfonylphenyl glyoxamide-based antimicrobial peptide mimics as novel antimicrobial agents. *Chemistryselect* **2017**, 2, 3452-3461.

## 6. Copies of NMR spectra

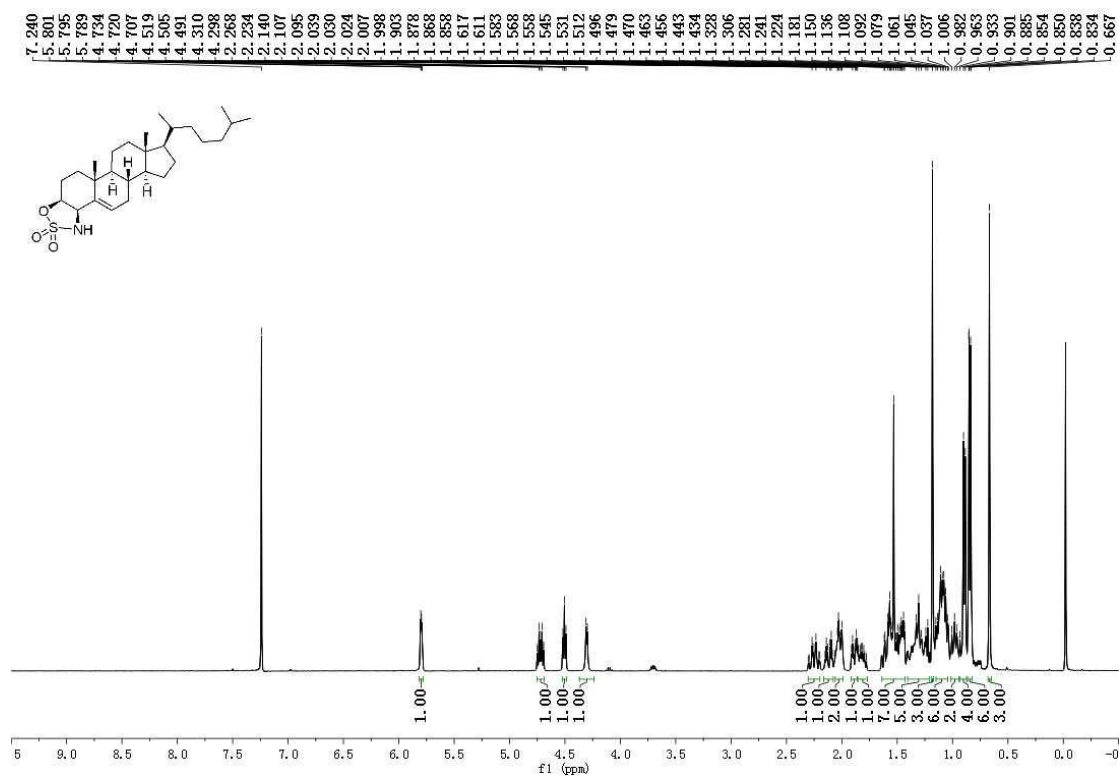

Figure S1.  $^1\text{H}$  NMR spectrum of **6a** (CDCl<sub>3</sub>, 400 MHz)

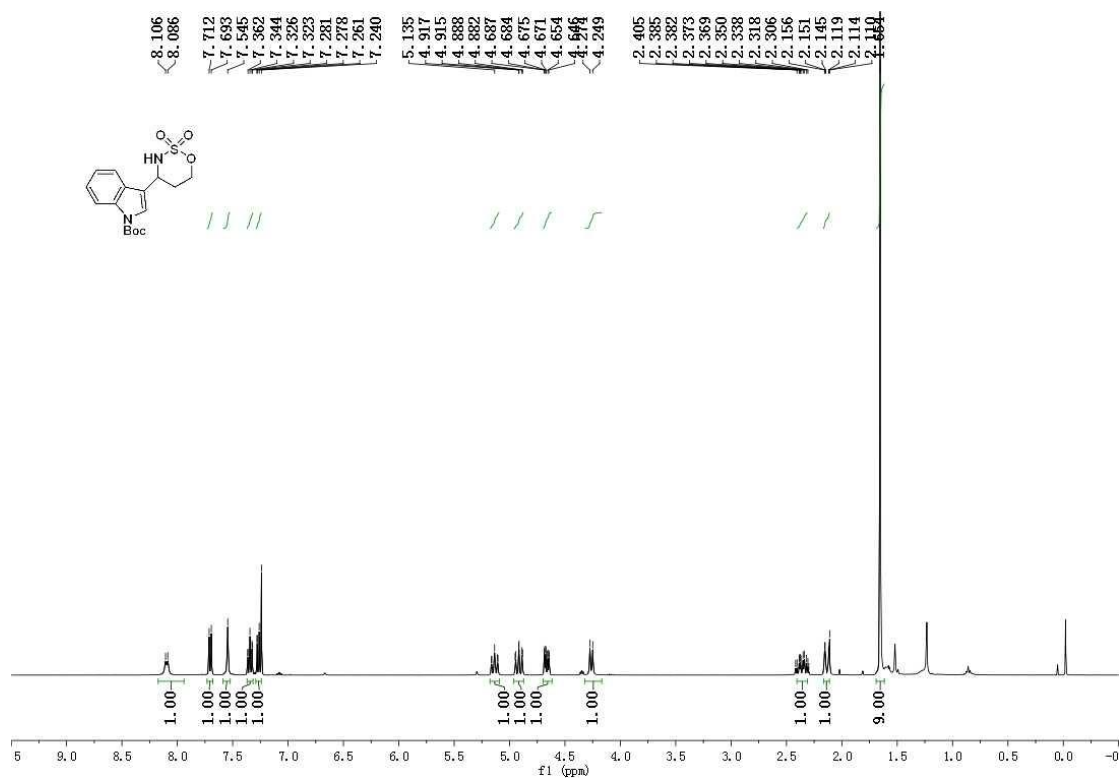

Figure S2.  $^1\text{H}$  NMR spectrum of **6b** (CDCl<sub>3</sub>, 400 MHz)



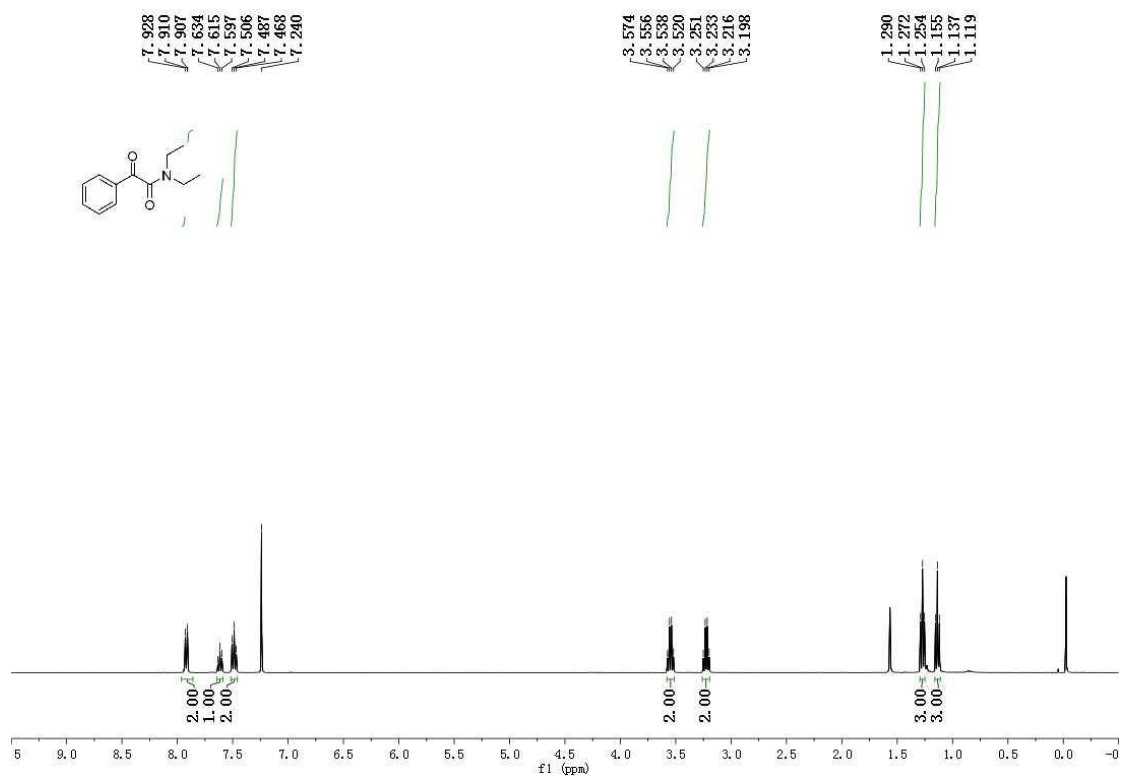

**Figure S3.** <sup>1</sup>H NMR spectrum of S3 (CDCl<sub>3</sub>, 400 MHz)

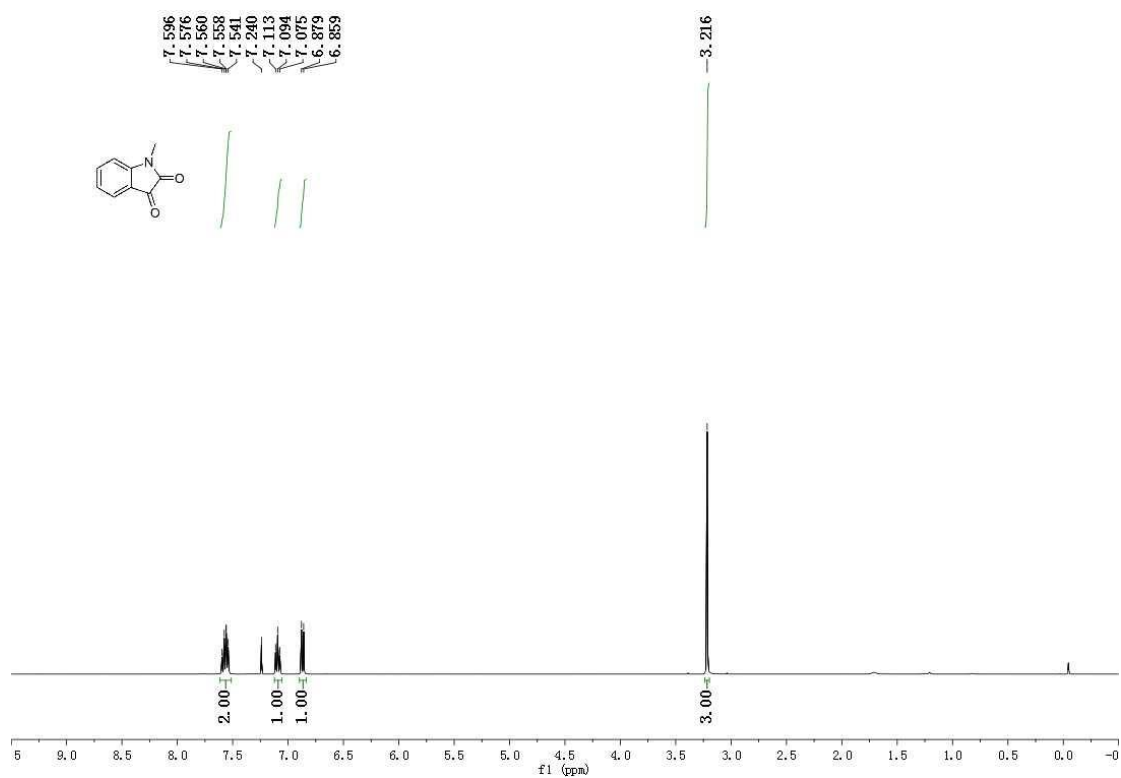

**Figure S4.** <sup>1</sup>H NMR spectrum of S4 (CDCl<sub>3</sub>, 400 MHz)

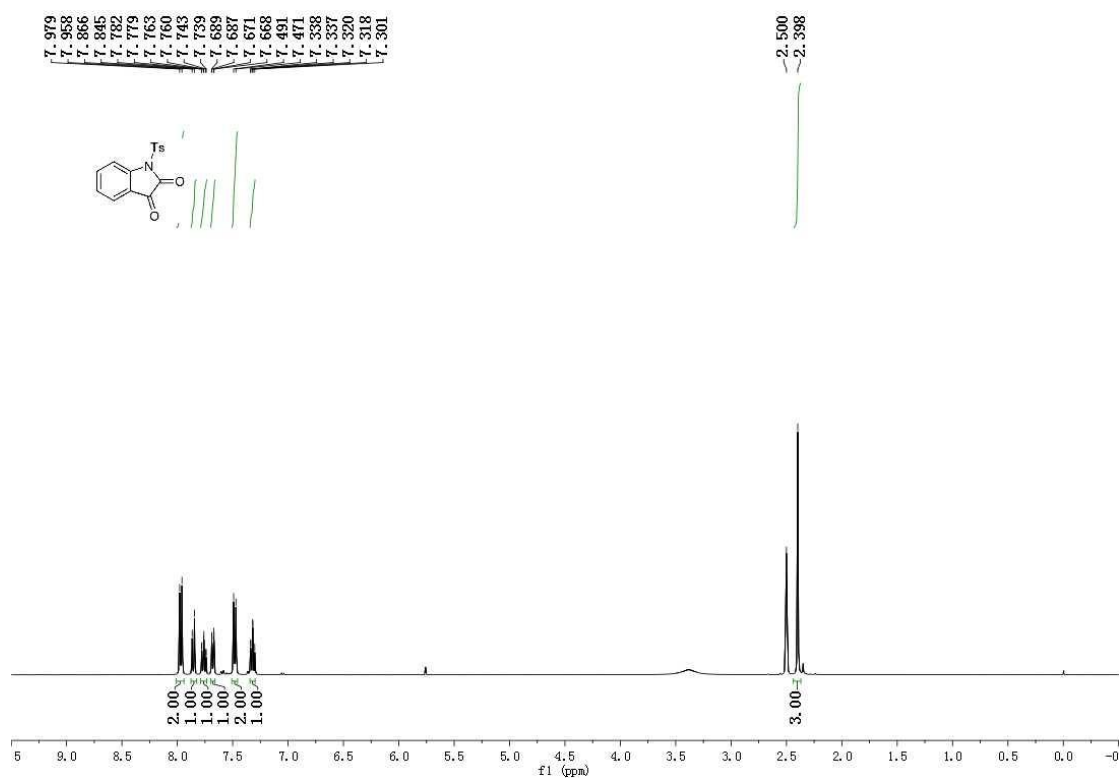

**Figure S5.**  $^1\text{H}$  NMR spectrum of **S5** ( $\text{CDCl}_3$ , 400 MHz)

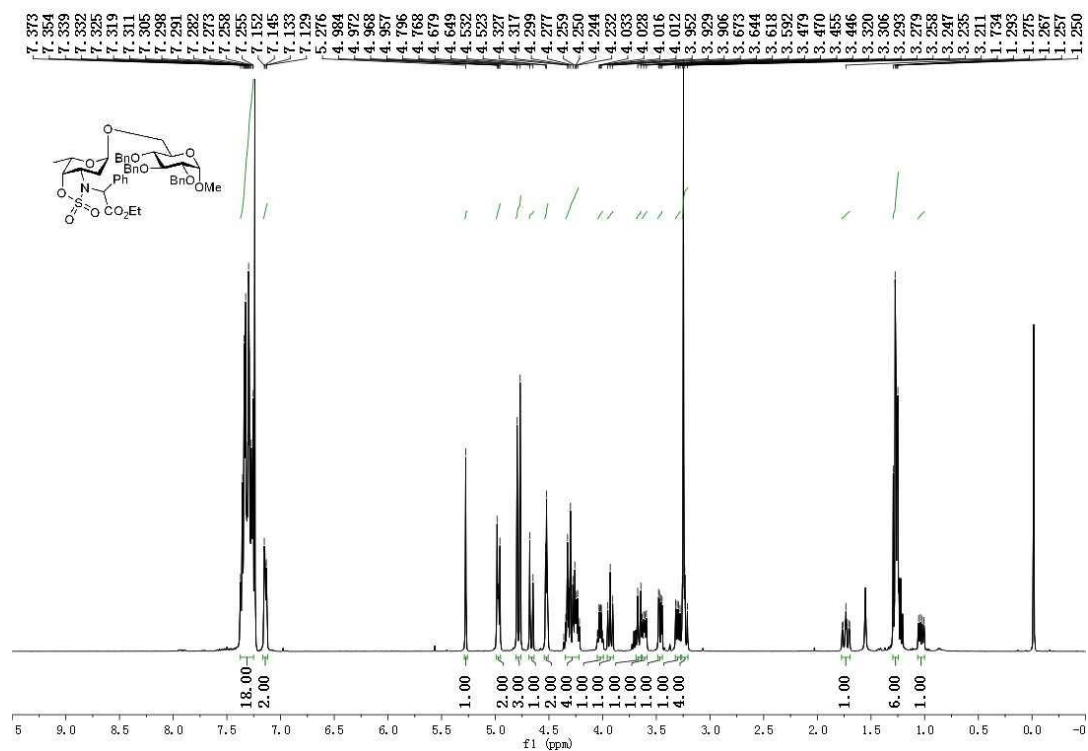

**Figure S6.**  $^1\text{H}$  NMR spectrum of **3a** ( $\text{CDCl}_3$ , 400 MHz)

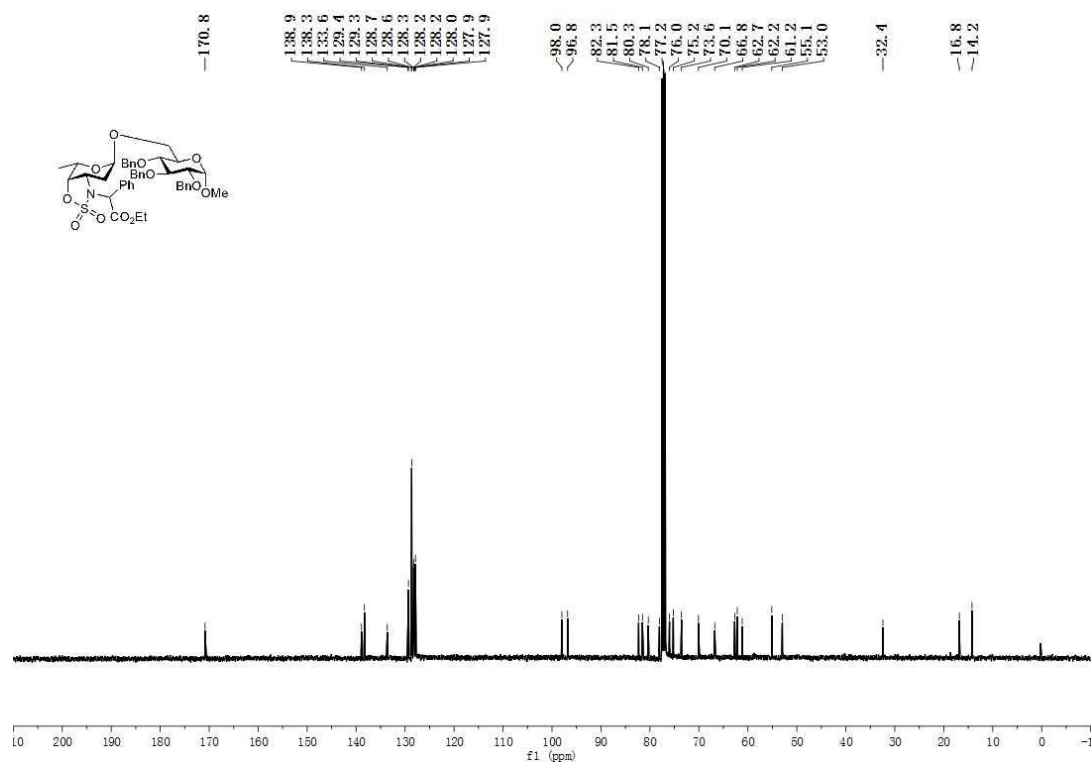

**Figure S7.** <sup>13</sup>C NMR spectrum of **3a** (CDCl<sub>3</sub>, 100 MHz)

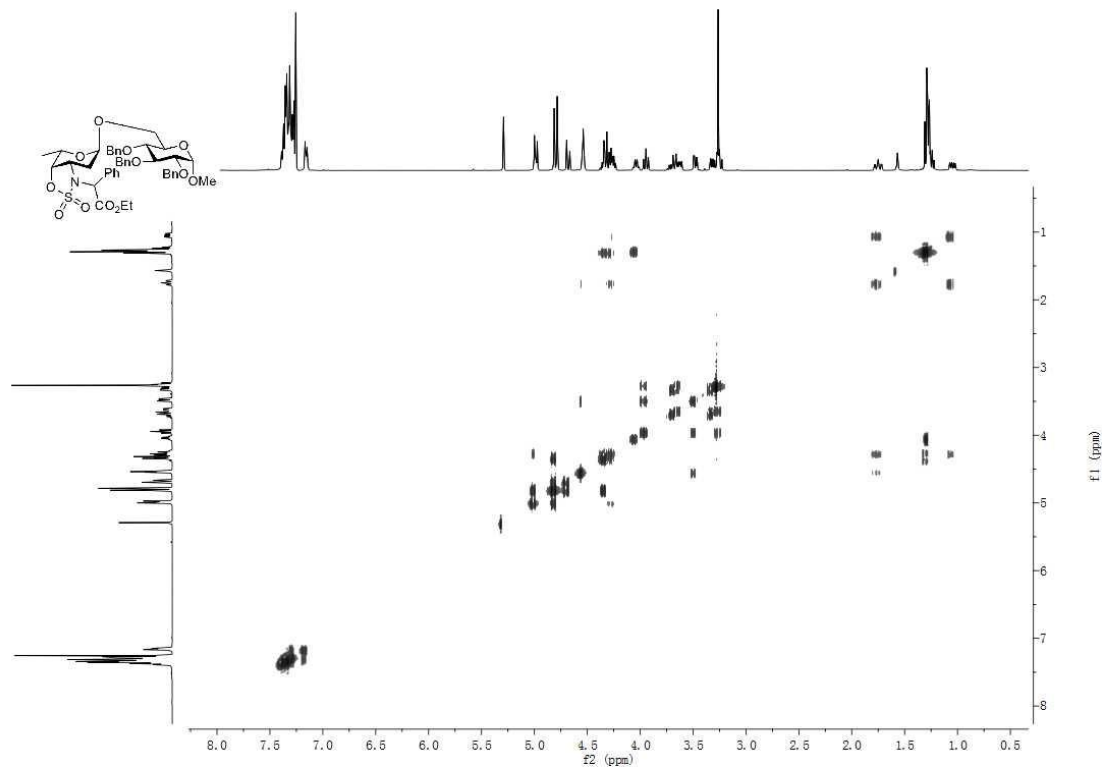

**Figure S8.** <sup>1</sup>H-<sup>1</sup>H COSY spectrum of **3a** (CDCl<sub>3</sub>, 400 MHz)



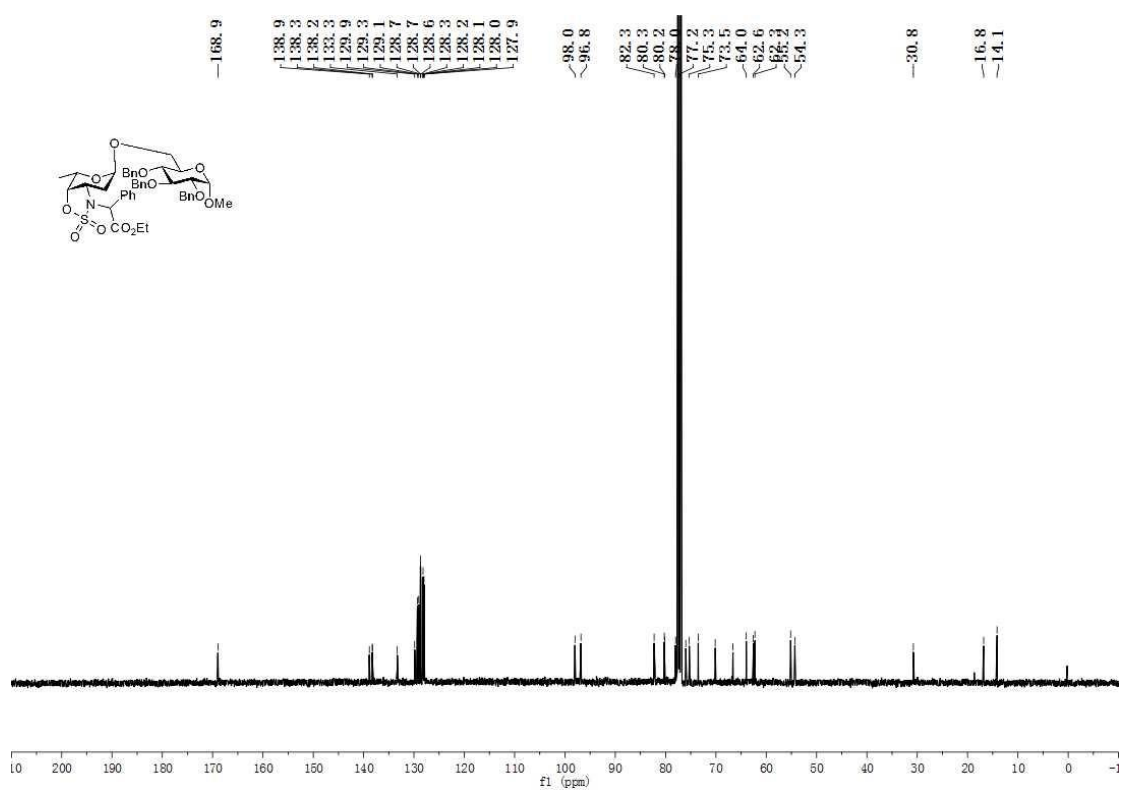

**Figure S11.** <sup>13</sup>C NMR spectrum of **3a'** (CDCl<sub>3</sub>, 100 MHz)

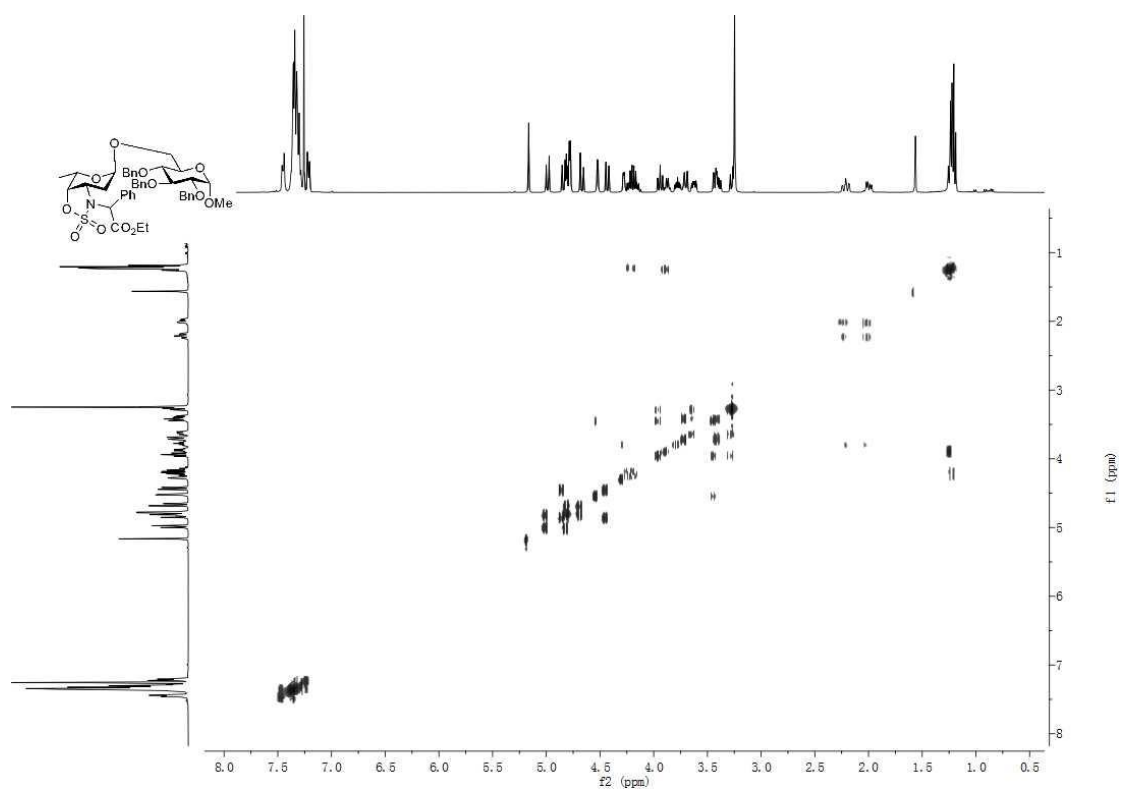

**Figure S12.** <sup>1</sup>H-<sup>1</sup>H COSY spectrum of **3a'** (CDCl<sub>3</sub>, 400 MHz)

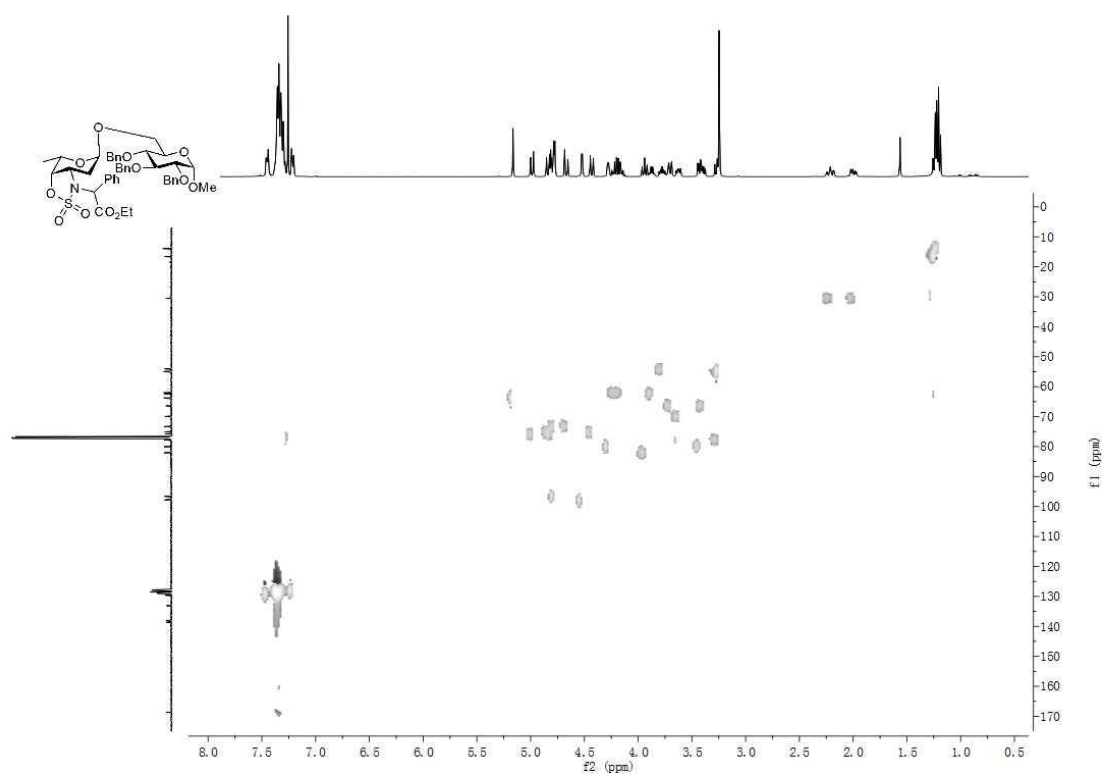

**Figure S13.** HSQC spectrum of **3a'** ( $\text{CDCl}_3$ )

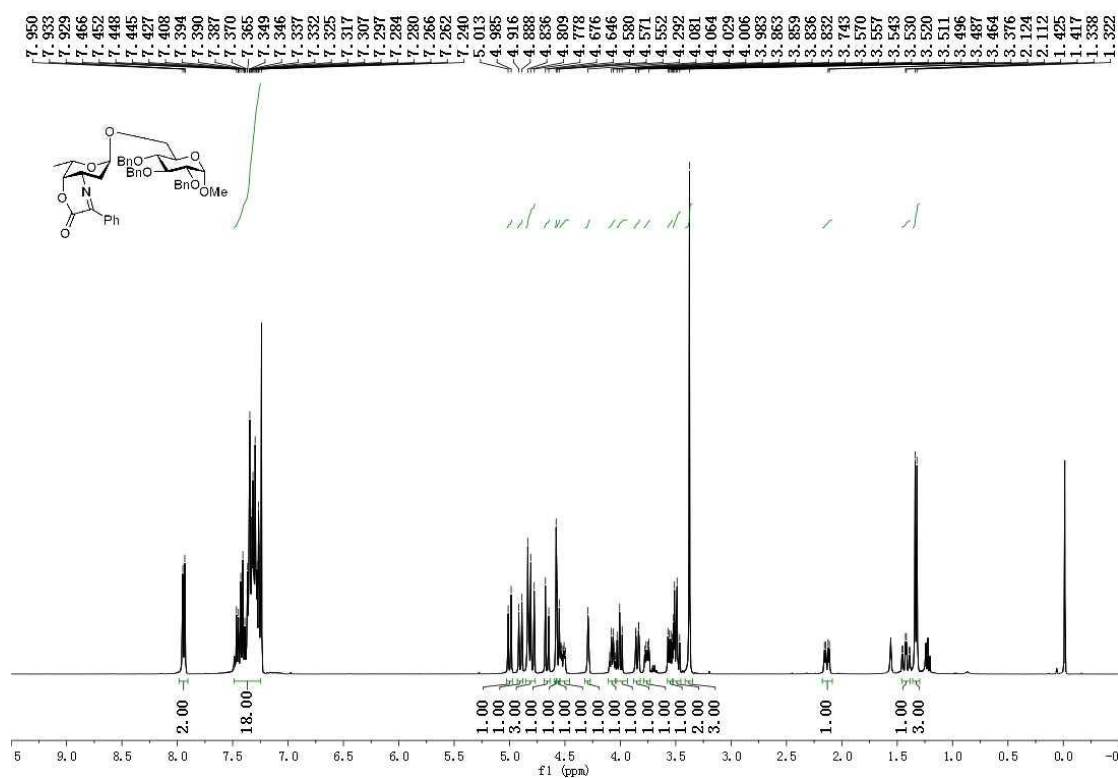

**Figure S14.**  $^1\text{H}$  NMR spectrum of **4a** ( $\text{CDCl}_3$ , 400 MHz)



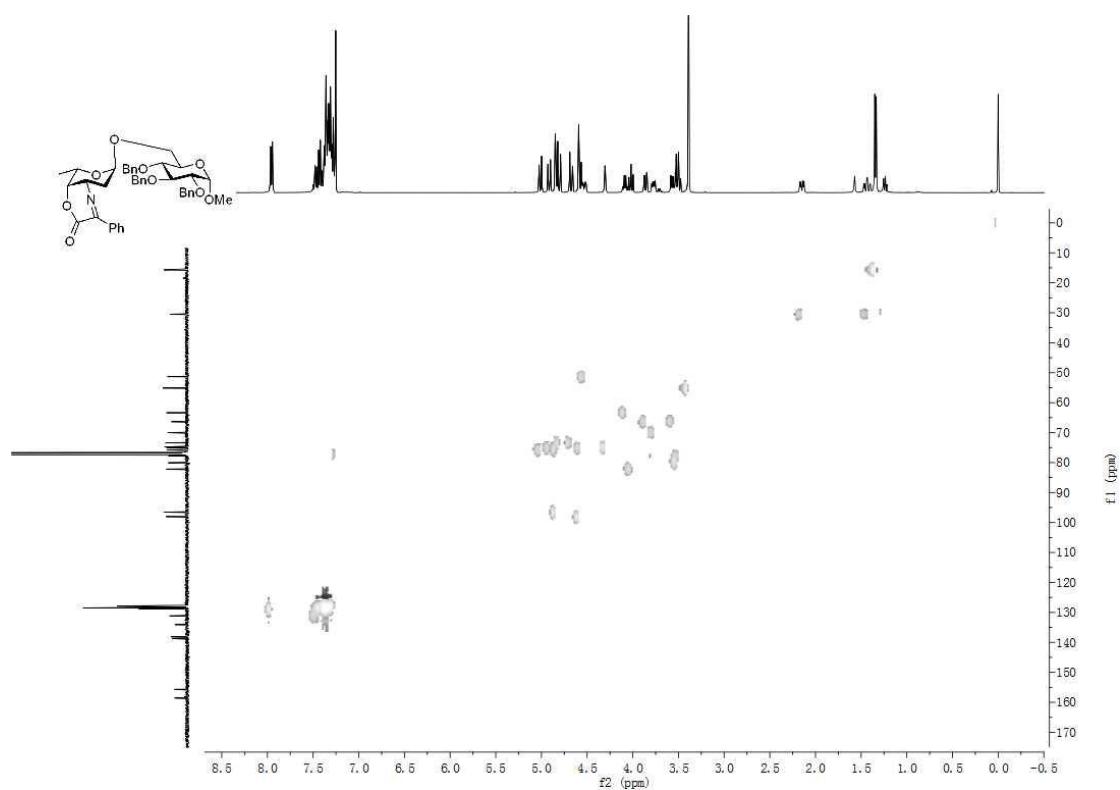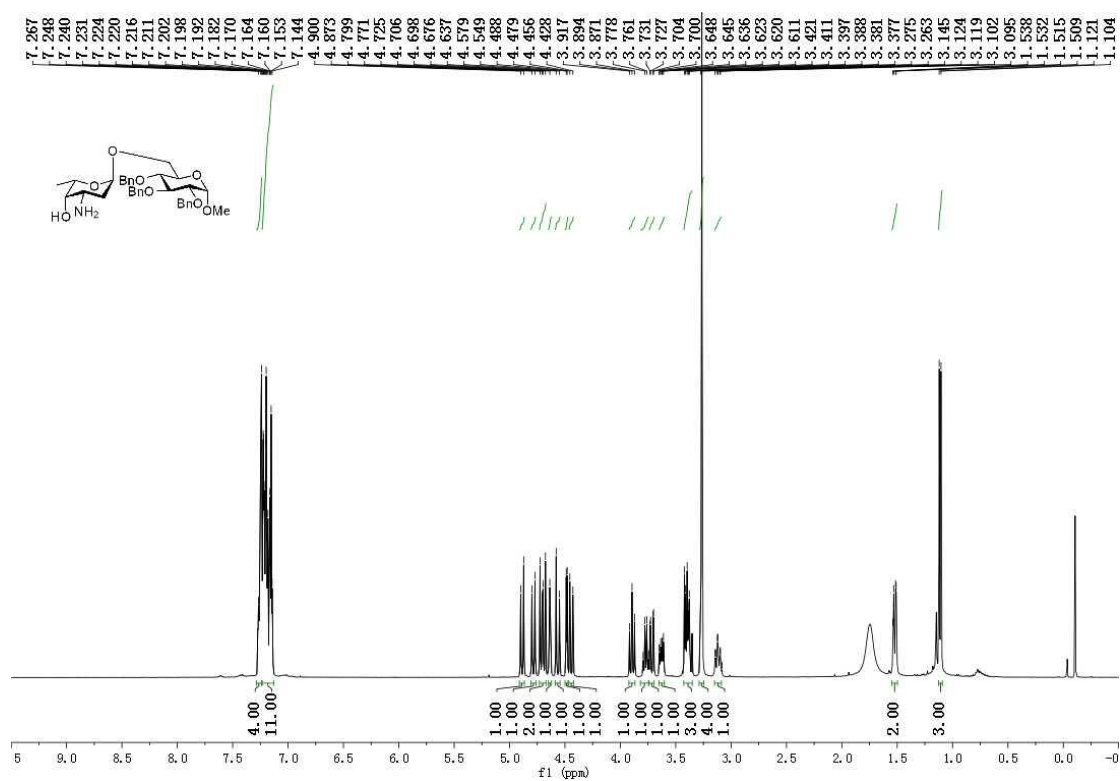



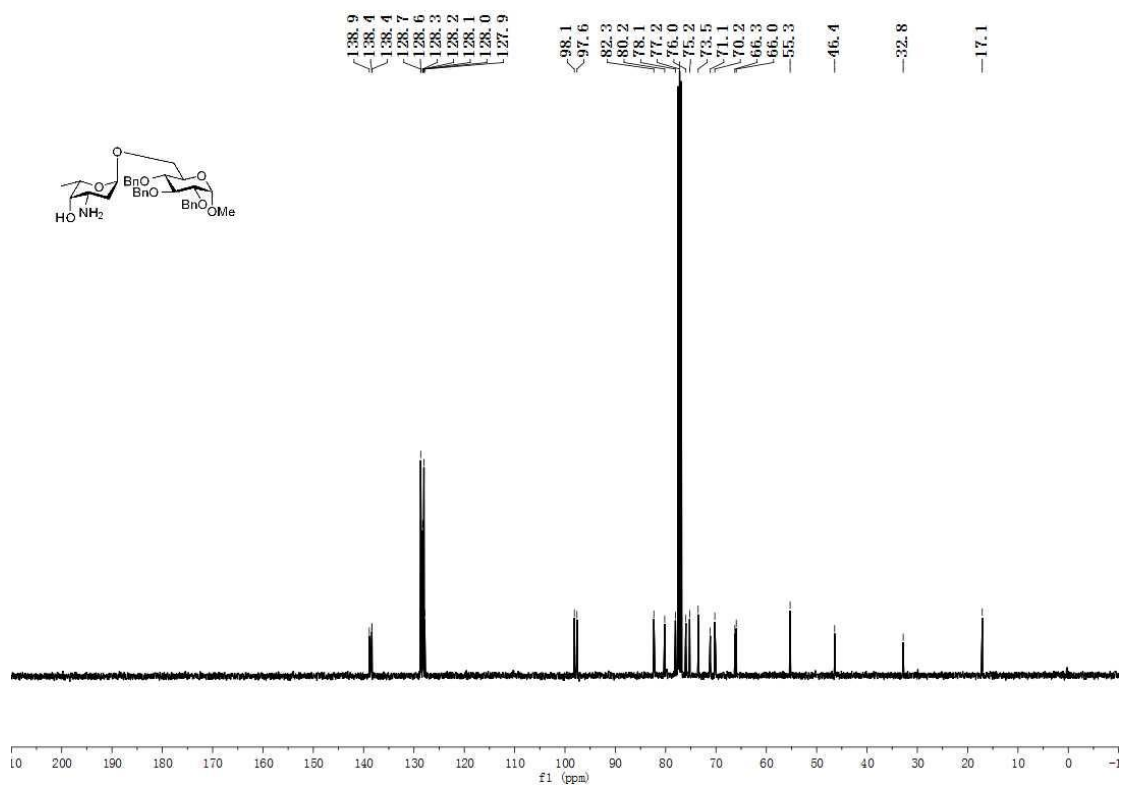

**Figure S19.** <sup>13</sup>C NMR spectrum of **2a** (CDCl<sub>3</sub>, 100 MHz)

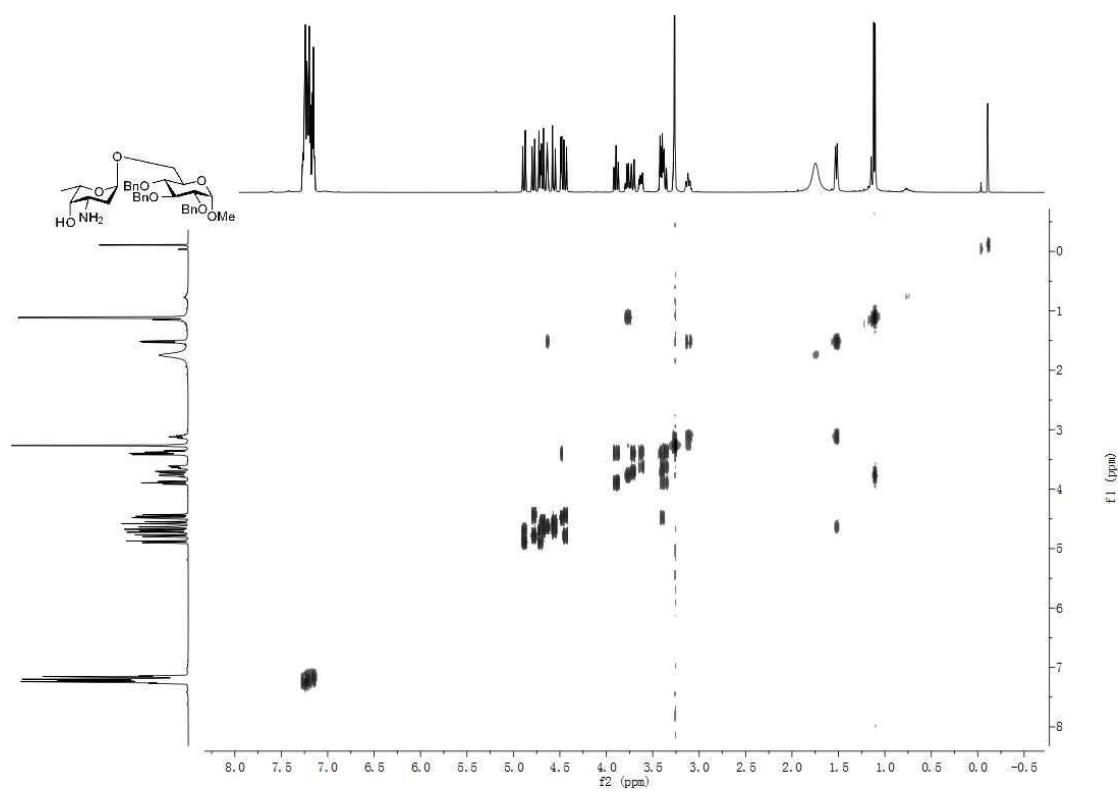

**Figure S20.** <sup>1</sup>H-<sup>1</sup>H COSY spectrum of **2a** (CDCl<sub>3</sub>, 400 MHz)

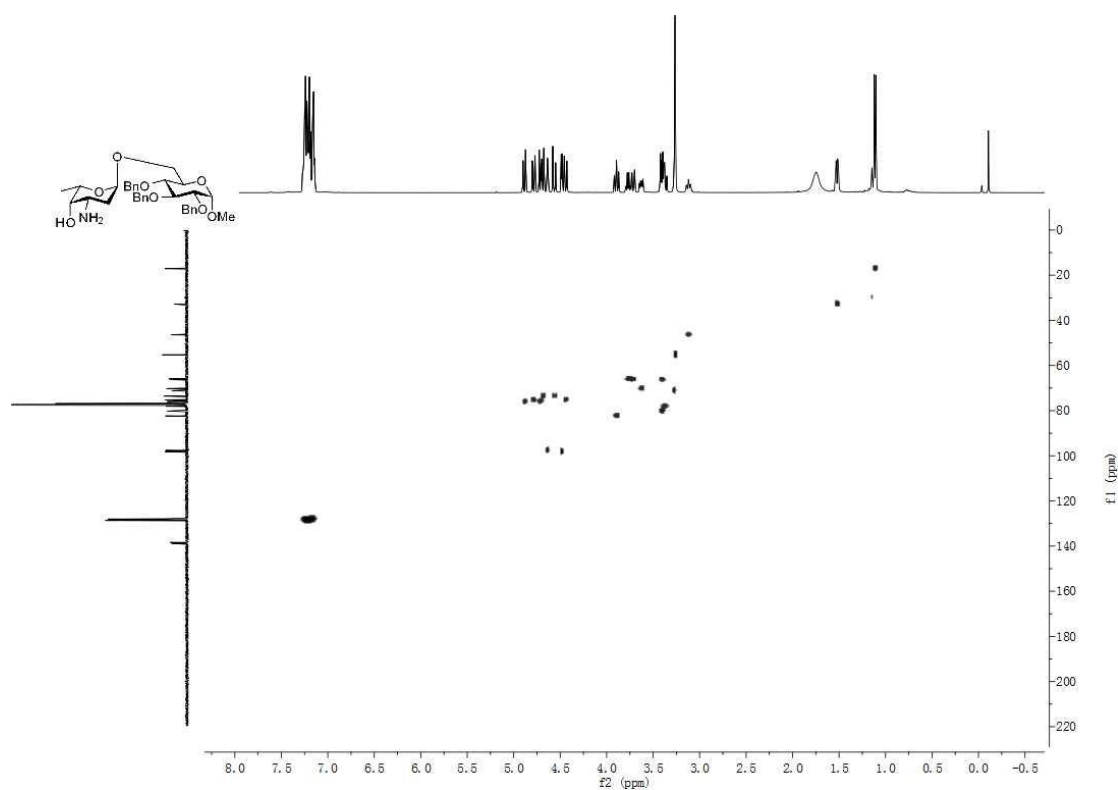

Figure S21. HSQC spectrum of **2a** ( $\text{CDCl}_3$ )

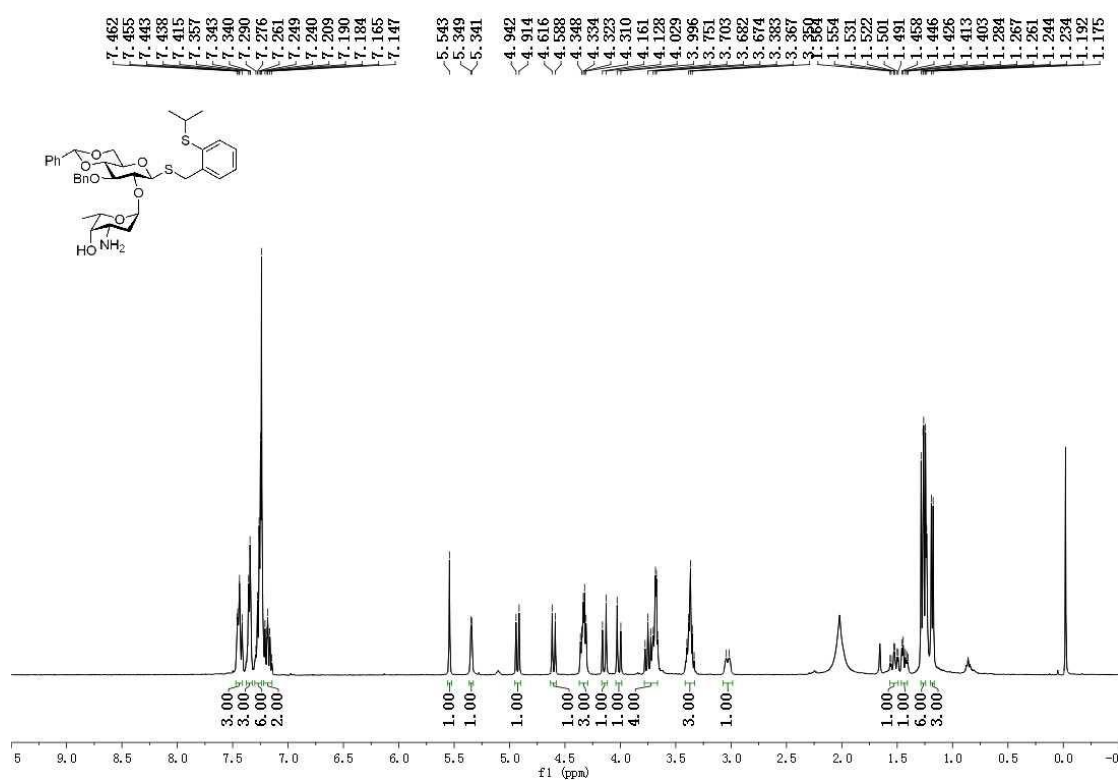

Figure S22.  $^1\text{H}$  NMR spectrum of **2b** ( $\text{CDCl}_3$ , 400 MHz)



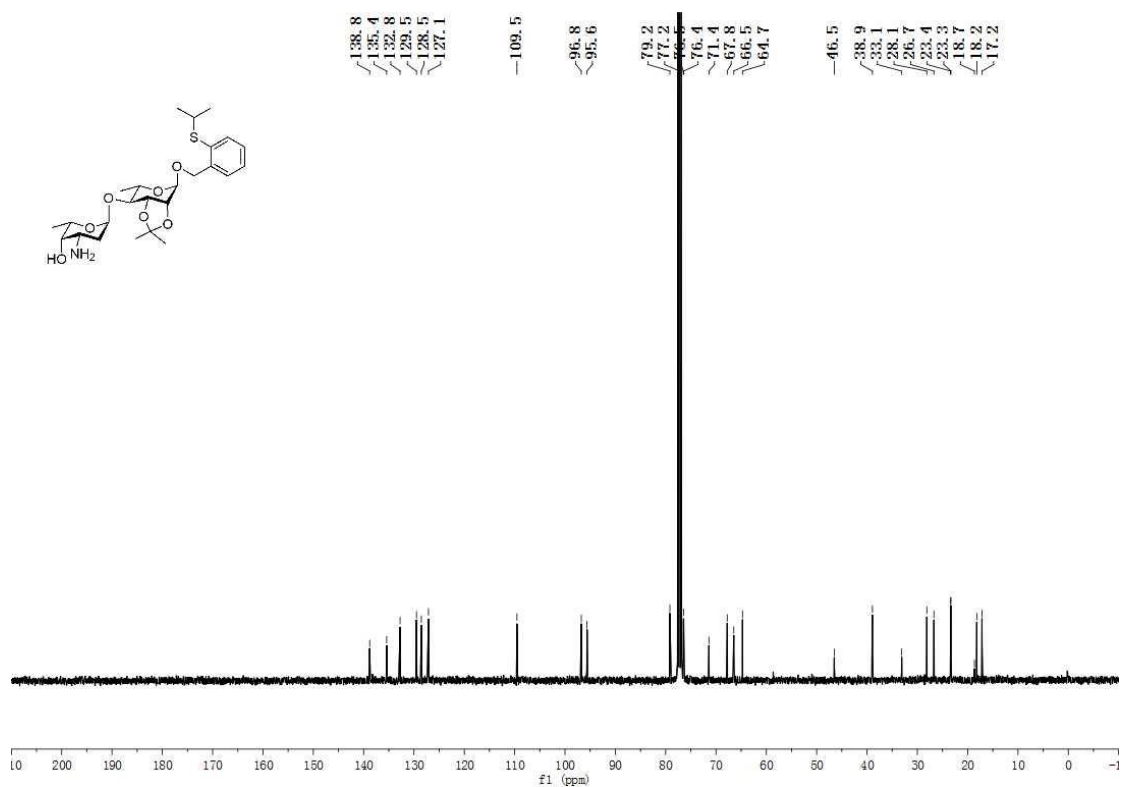

**Figure S25.** <sup>13</sup>C NMR spectrum of **2c** (CDCl<sub>3</sub>, 100 MHz)

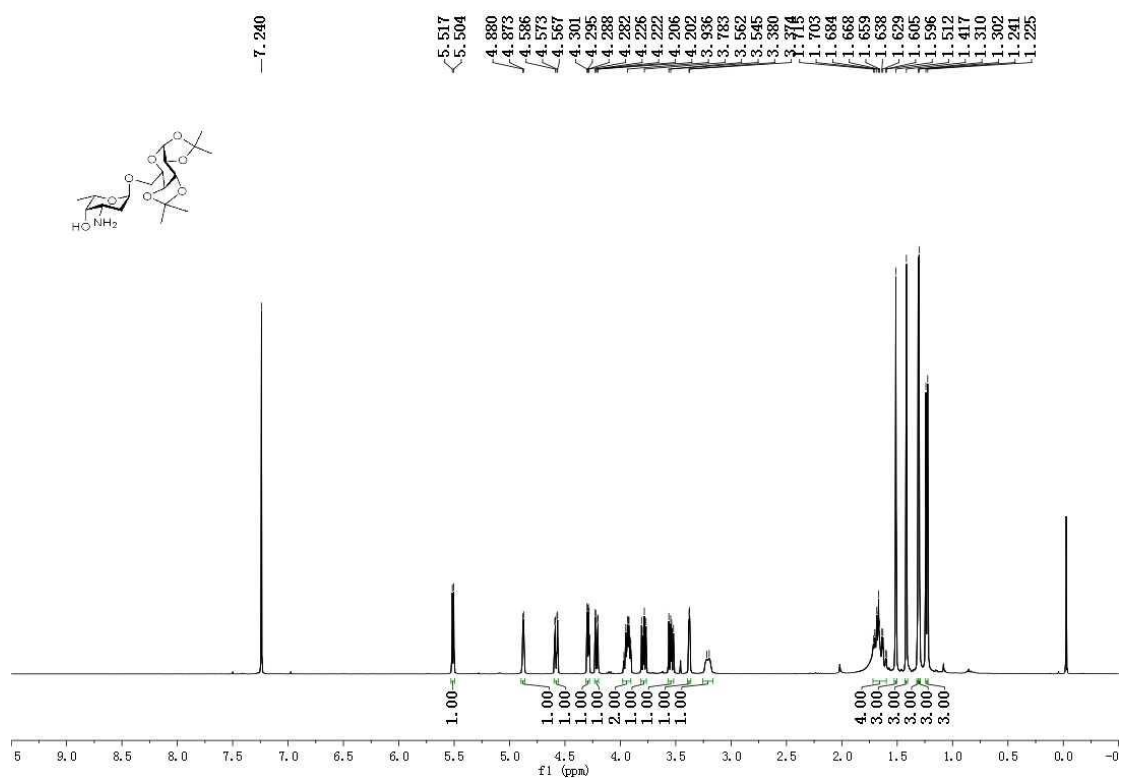

**Figure S26.** <sup>1</sup>H NMR spectrum of **2d** (CDCl<sub>3</sub>, 400 MHz)



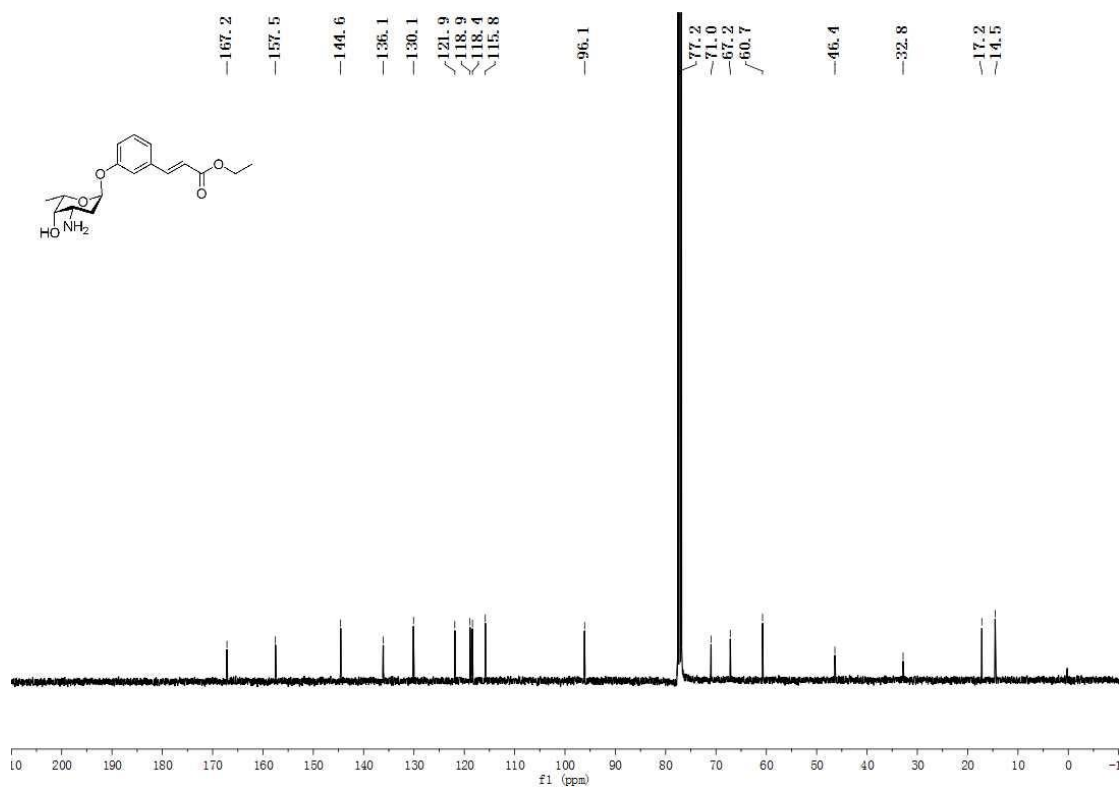

Figure S29. <sup>13</sup>C NMR spectrum of **2e** (CDCl<sub>3</sub>, 100 MHz)

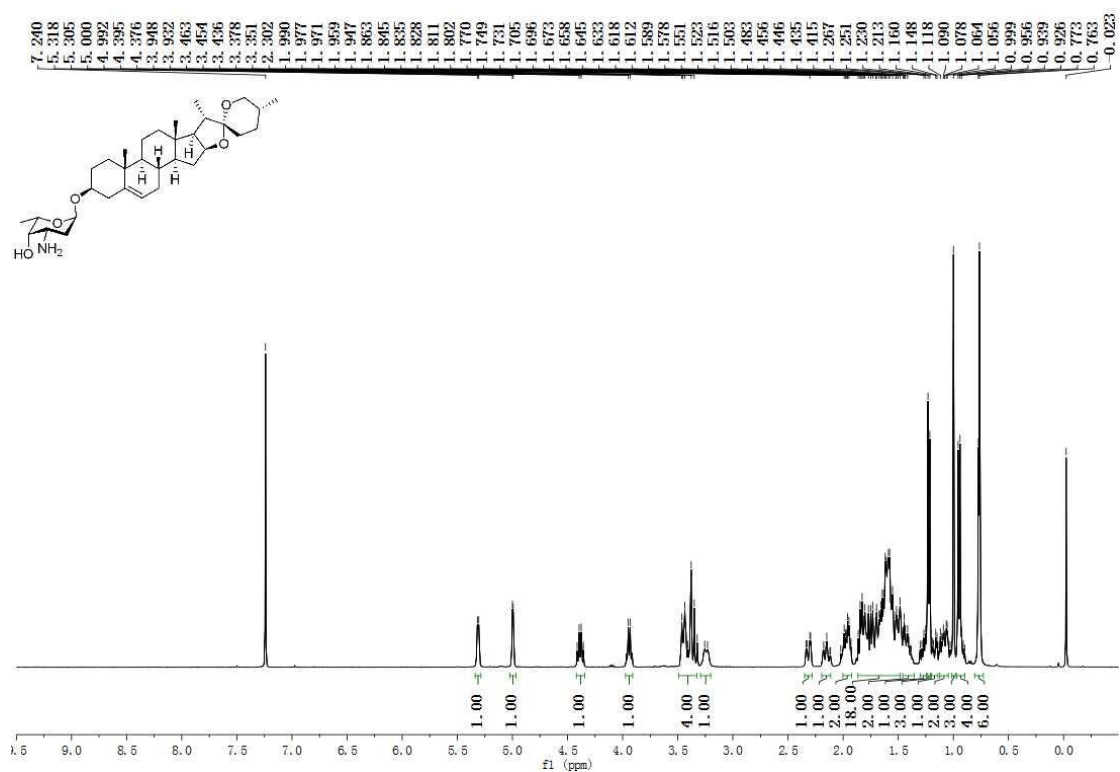

Figure S30. <sup>1</sup>H NMR spectrum of **2f** (CDCl<sub>3</sub>, 400 MHz)



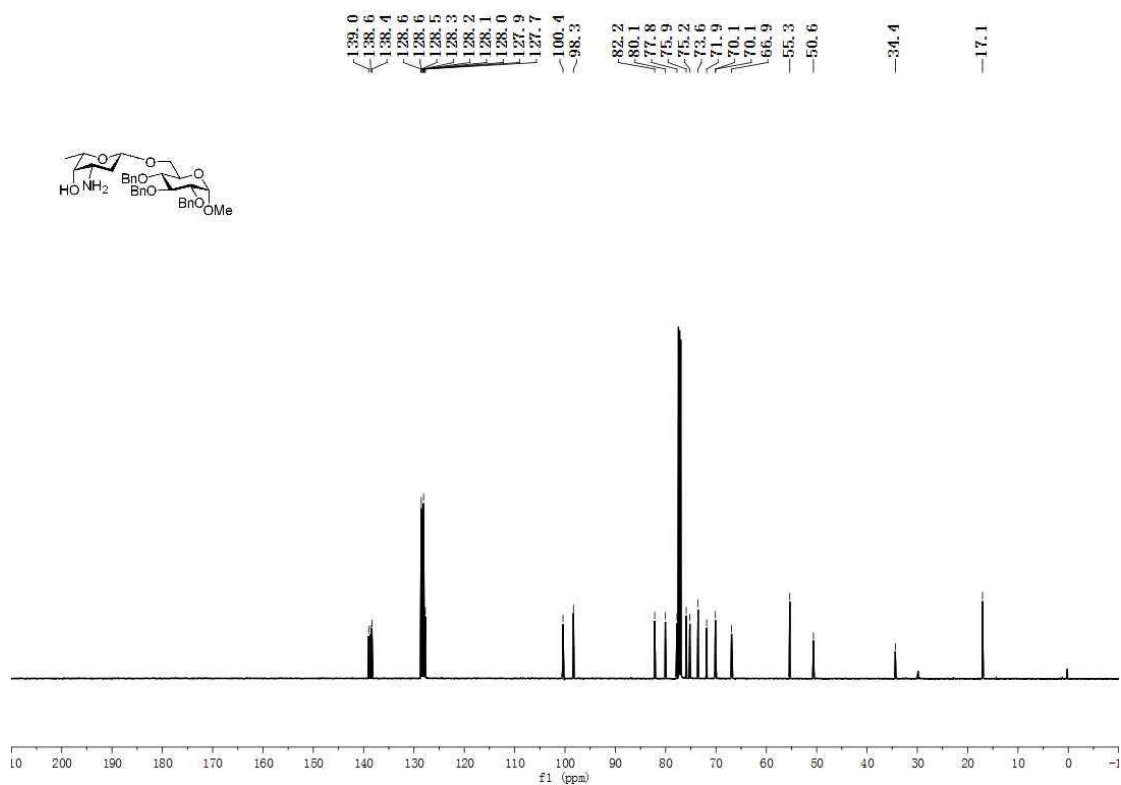

**Figure S33.** <sup>13</sup>C NMR spectrum of **2g** (CDCl<sub>3</sub>, 125 MHz)

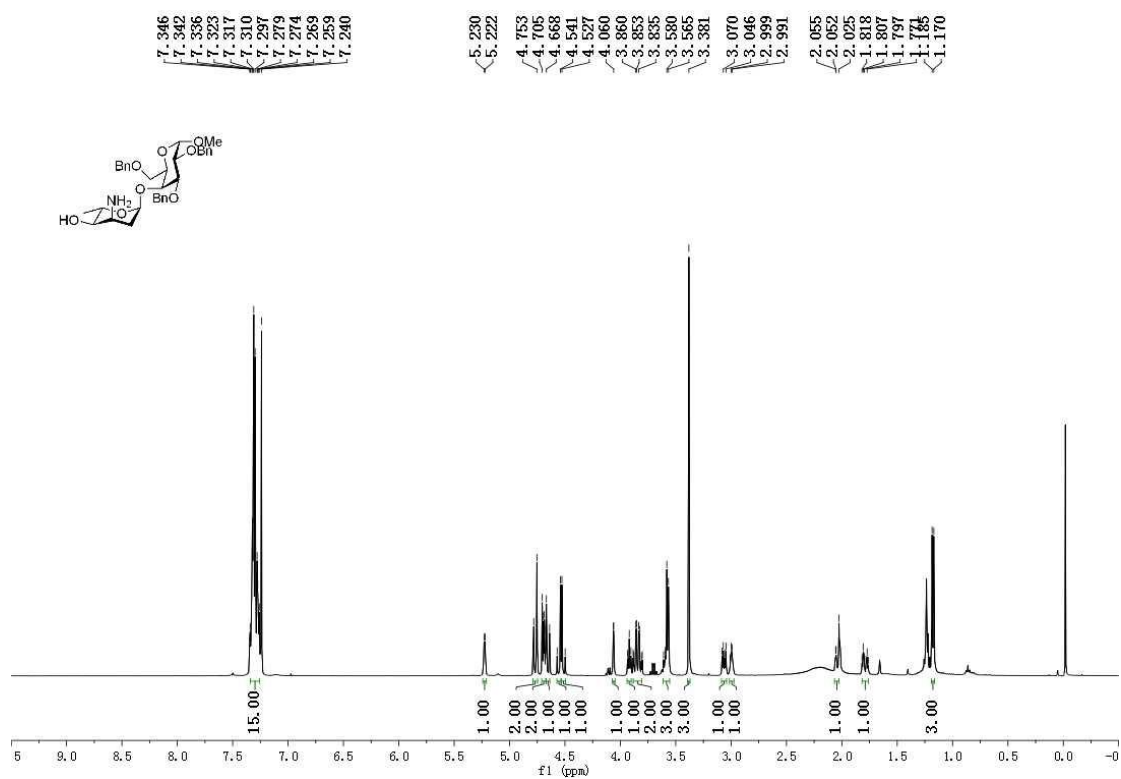

**Figure S34.** <sup>1</sup>H NMR spectrum of **2h** (CDCl<sub>3</sub>, 400 MHz)



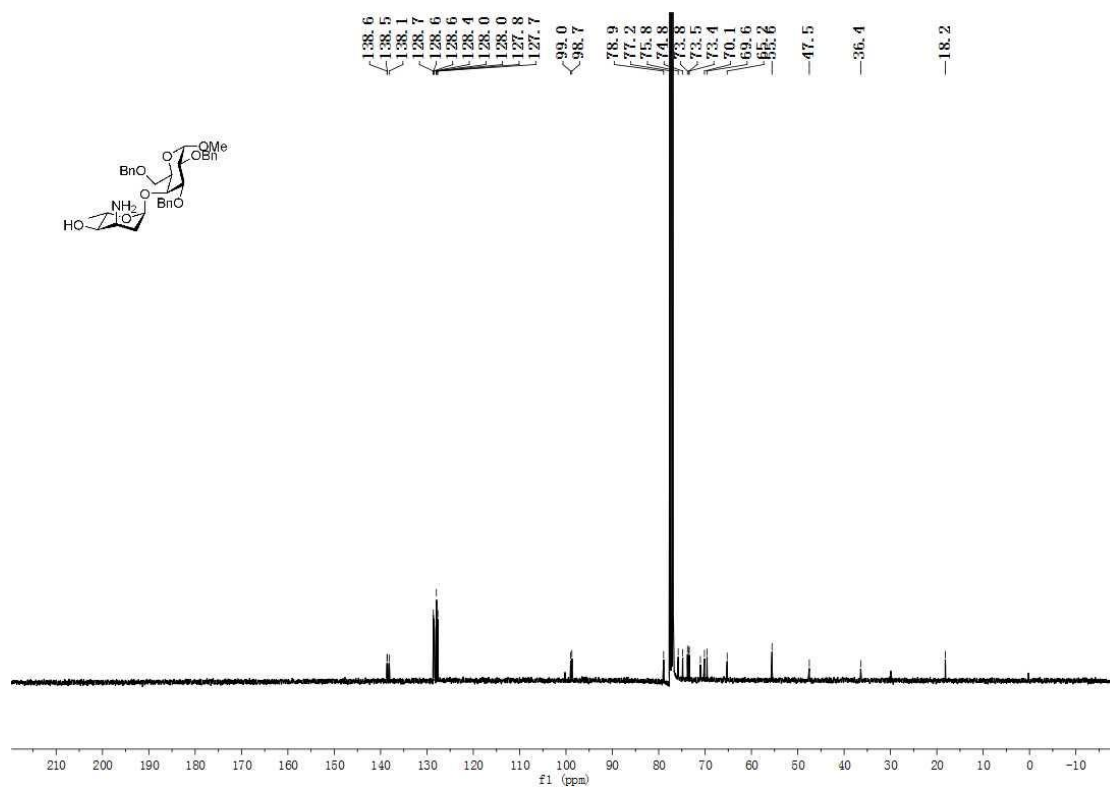

**Figure S35.** <sup>13</sup>C NMR spectrum of **2h** (CDCl<sub>3</sub>, 100 MHz)

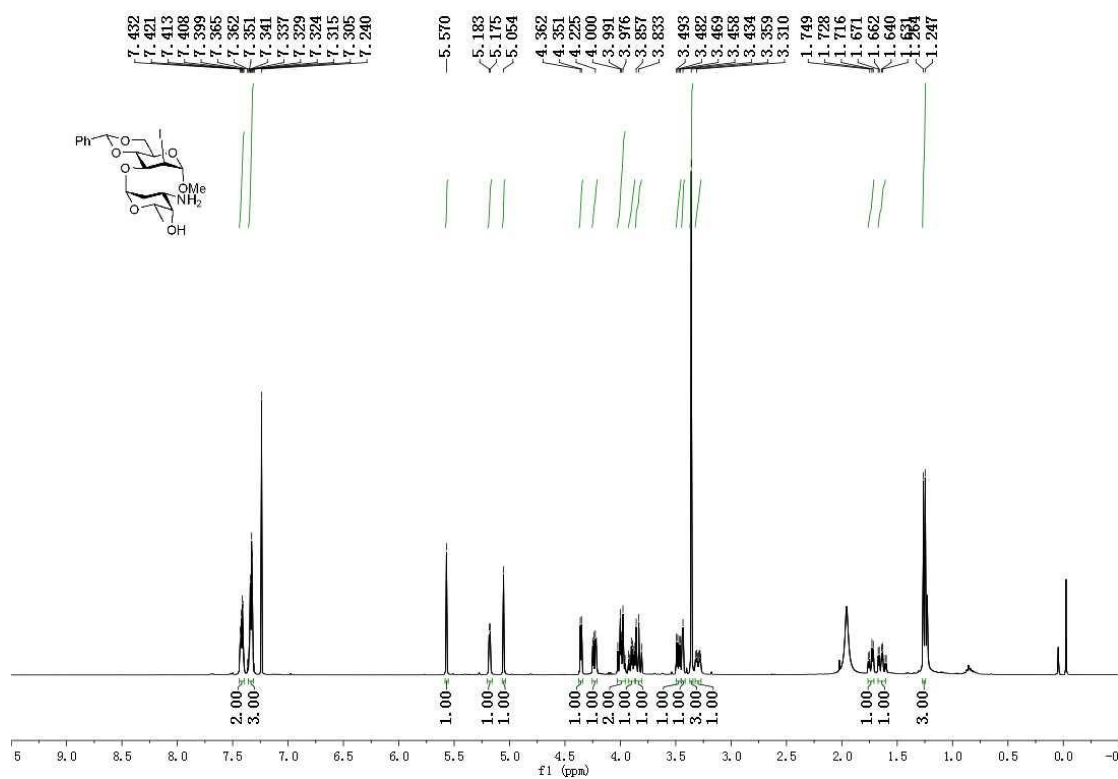

**Figure S36.** <sup>1</sup>H NMR spectrum of **2i** (CDCl<sub>3</sub>, 400 MHz)

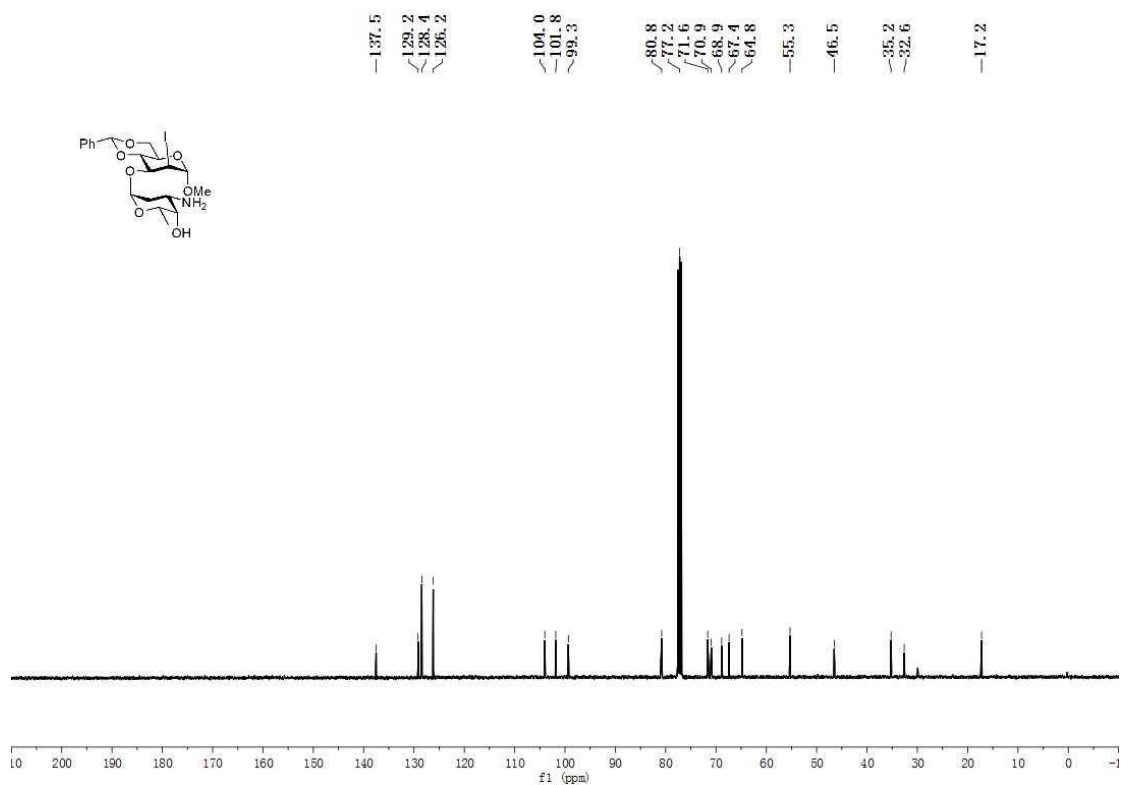

**Figure S37.** <sup>13</sup>C NMR spectrum of **2i** (CDCl<sub>3</sub>, 100 MHz)

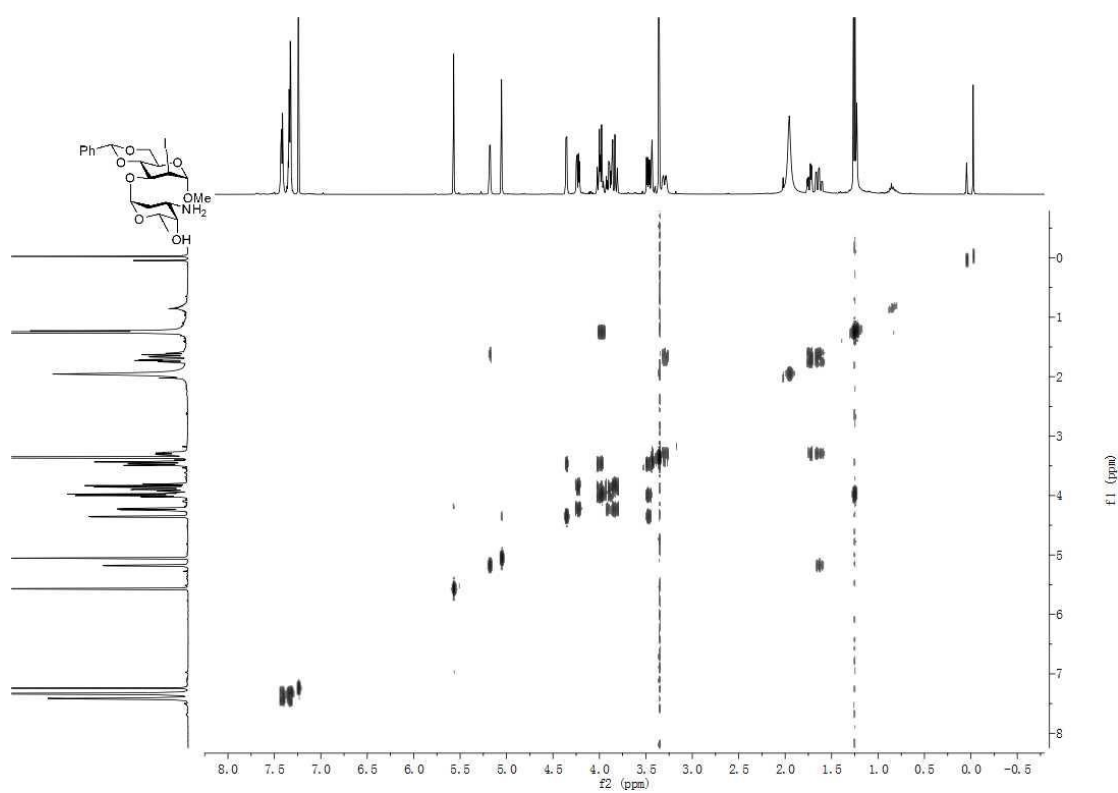

**Figure S38.** <sup>1</sup>H-<sup>1</sup>H COSY spectrum of **2i** (CDCl<sub>3</sub>, 400 MHz)



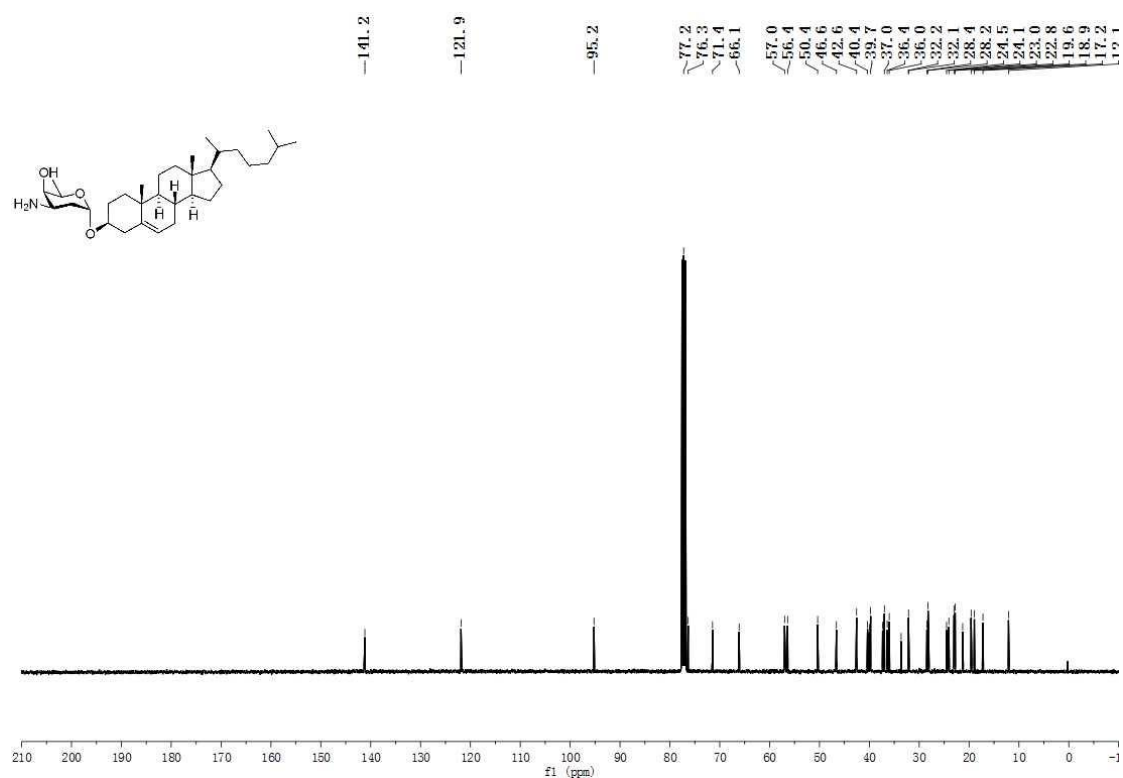

**Figure S41.**  $^{13}\text{C}$  NMR spectrum of **2j** (CDCl<sub>3</sub>, 100 MHz)

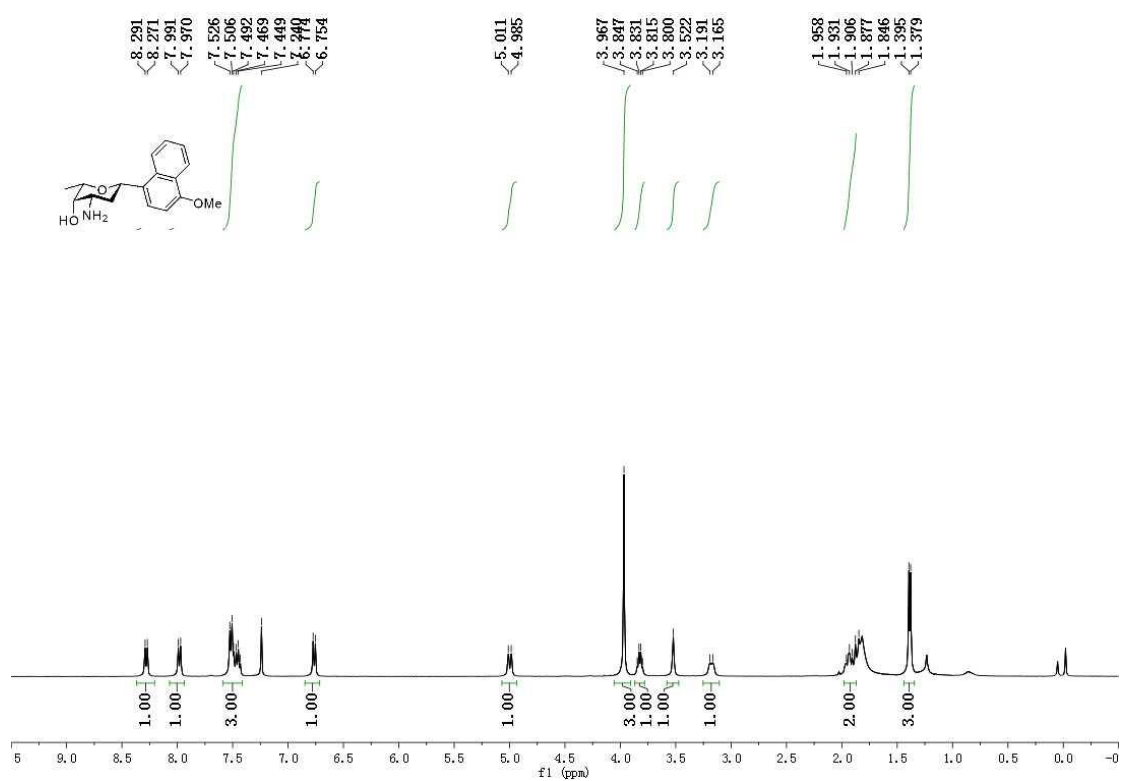

**Figure S42.**  $^1\text{H}$  NMR spectrum of **2k** (CDCl<sub>3</sub>, 400 MHz)

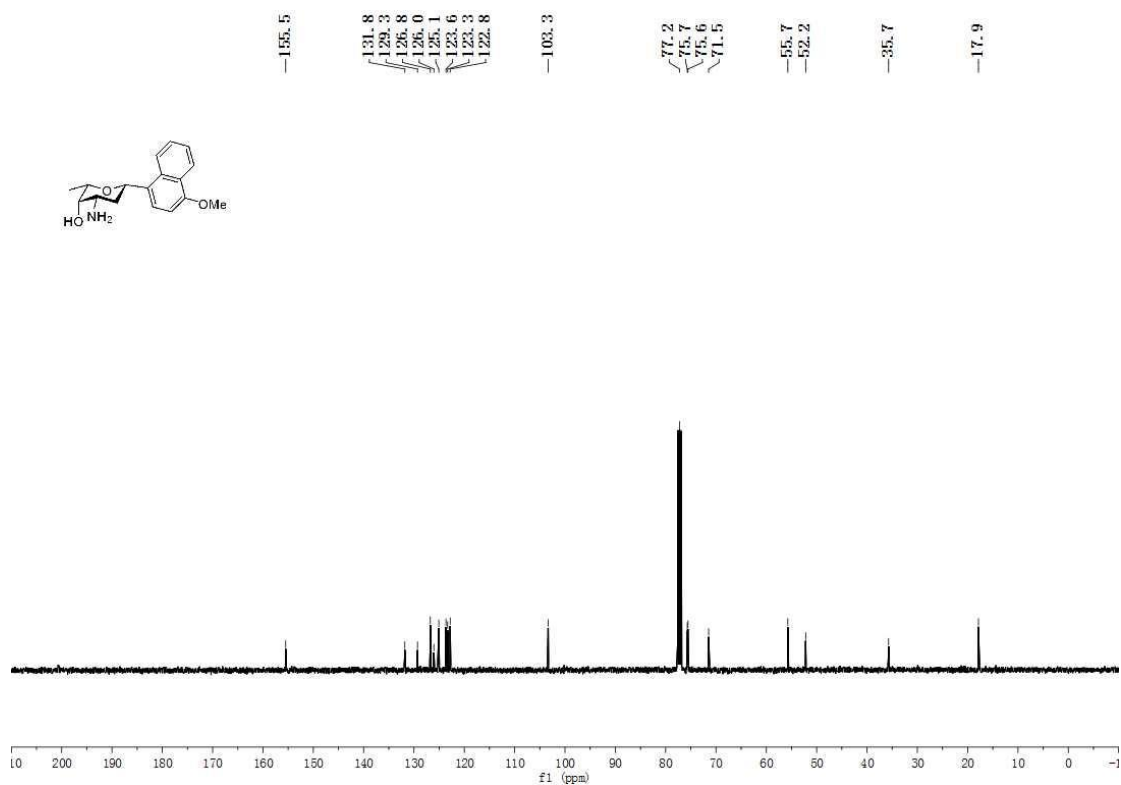

**Figure S43.**  $^{13}\text{C}$  NMR spectrum of **2k** (CDCl<sub>3</sub>, 100 MHz)

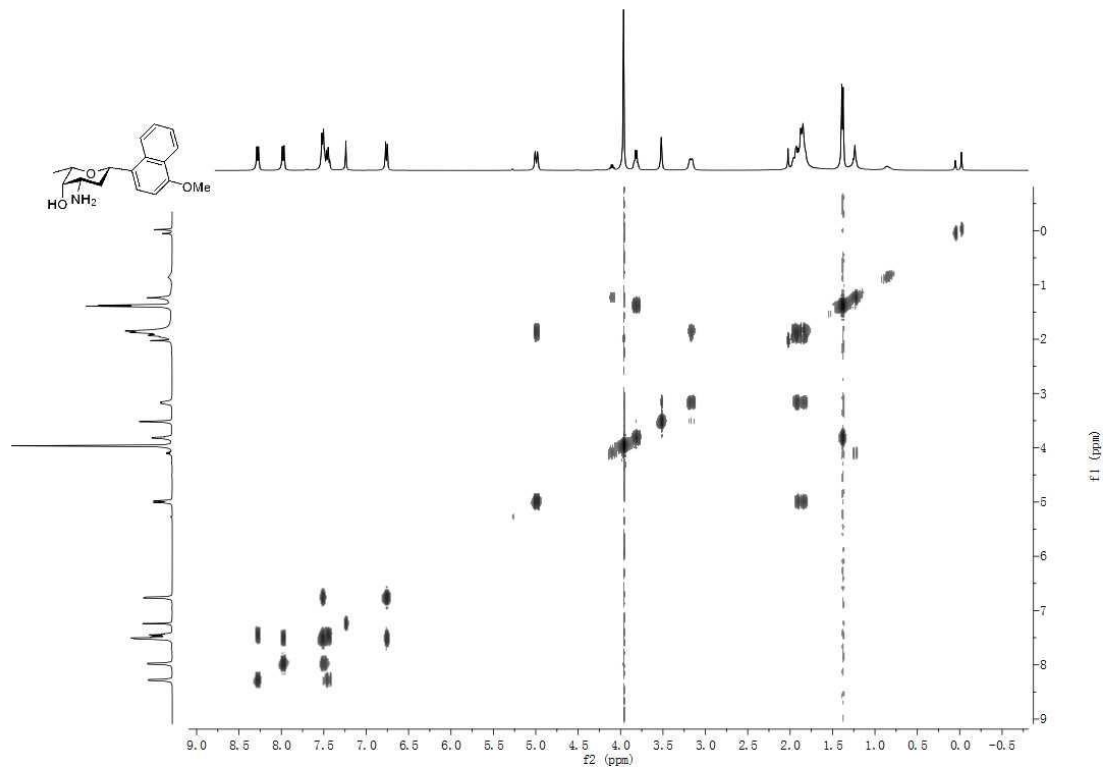

**Figure S44.**  $^1\text{H}$ - $^1\text{H}$  COSY spectrum of **2k** (CDCl<sub>3</sub>, 400 MHz)



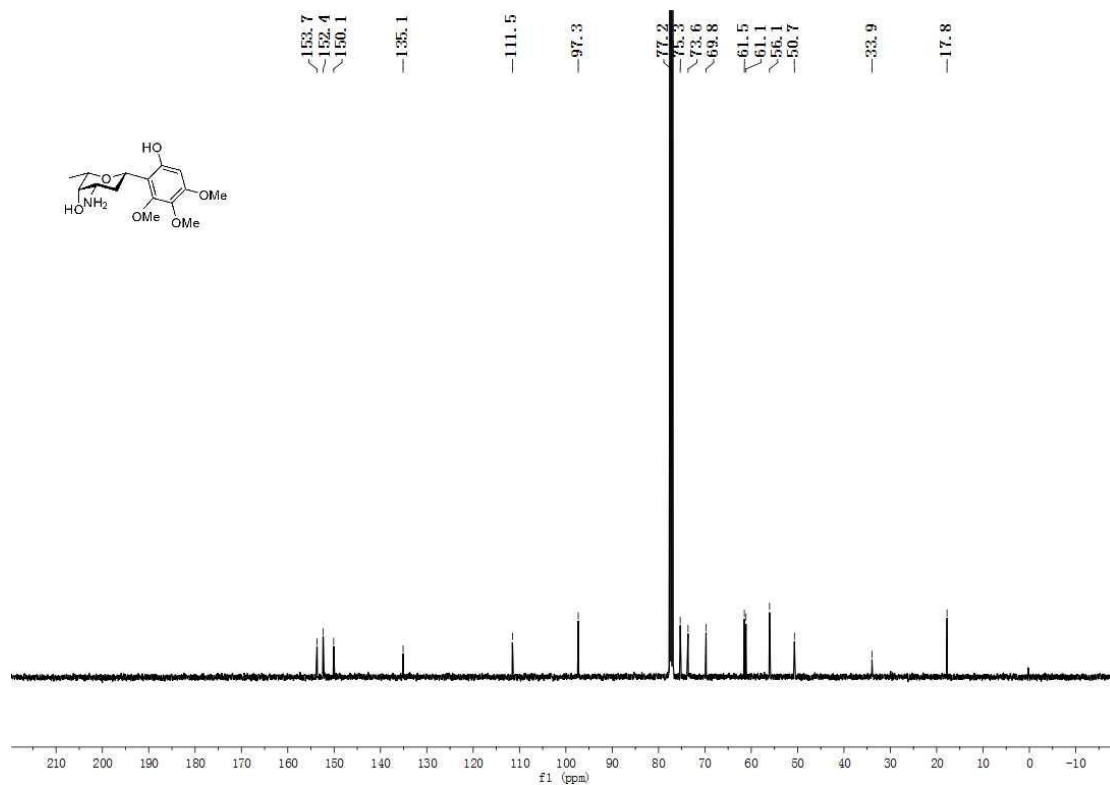

**Figure S47.**  $^{13}\text{C}$  NMR spectrum of **2l** ( $\text{CDCl}_3$ , 100 MHz)

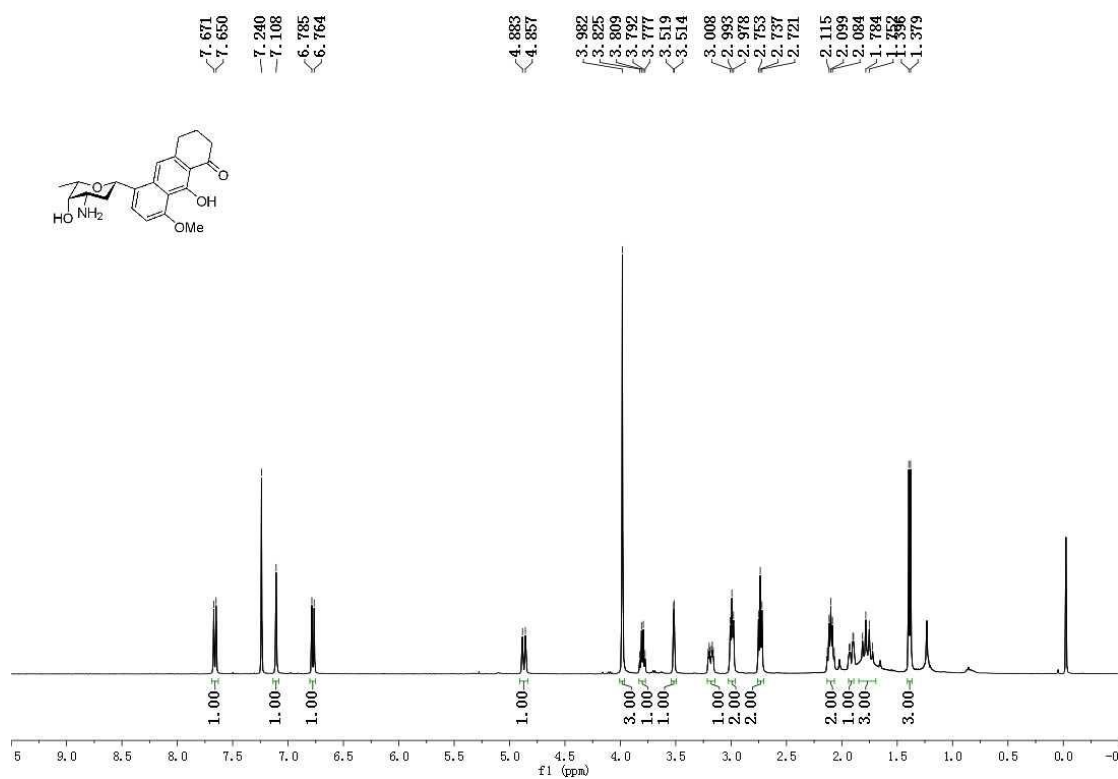

**Figure S48.**  $^1\text{H}$  NMR spectrum of **2m** ( $\text{CDCl}_3$ , 400 MHz)

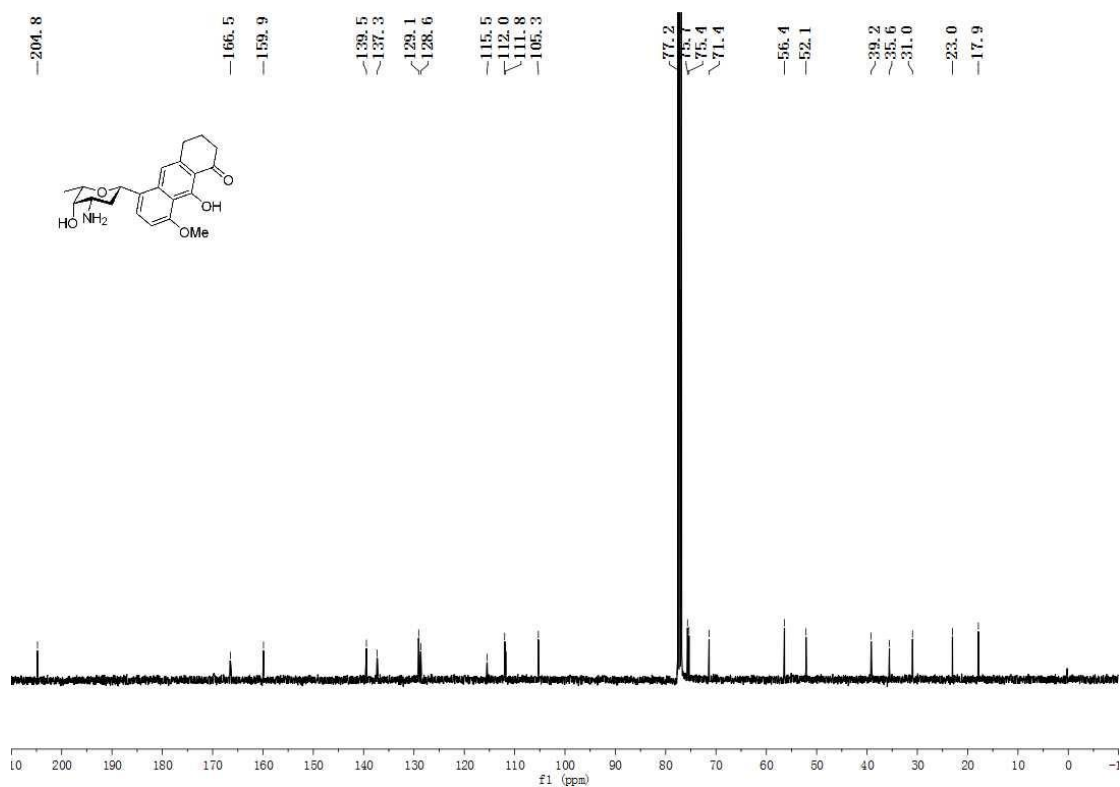

**Figure S49.** <sup>13</sup>C NMR spectrum of **2m** (CDCl<sub>3</sub>, 100 MHz)

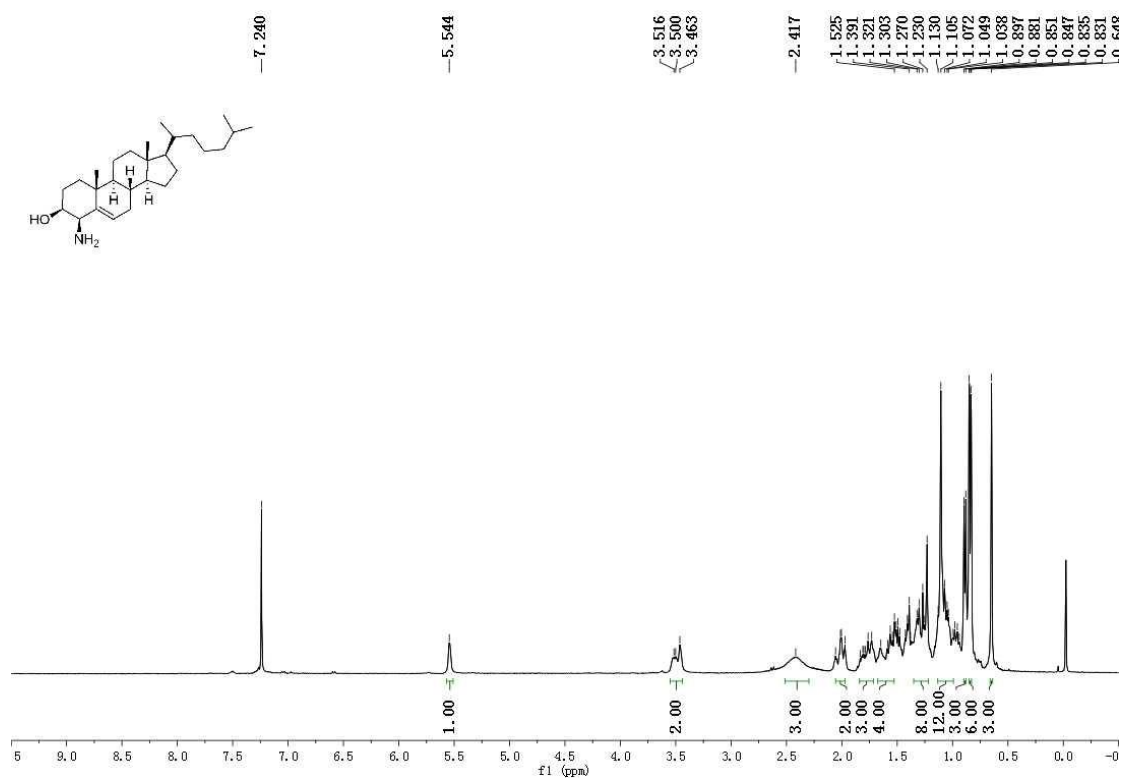

**Figure S50.** <sup>1</sup>H NMR spectrum of **7a** (CDCl<sub>3</sub>, 400 MHz)



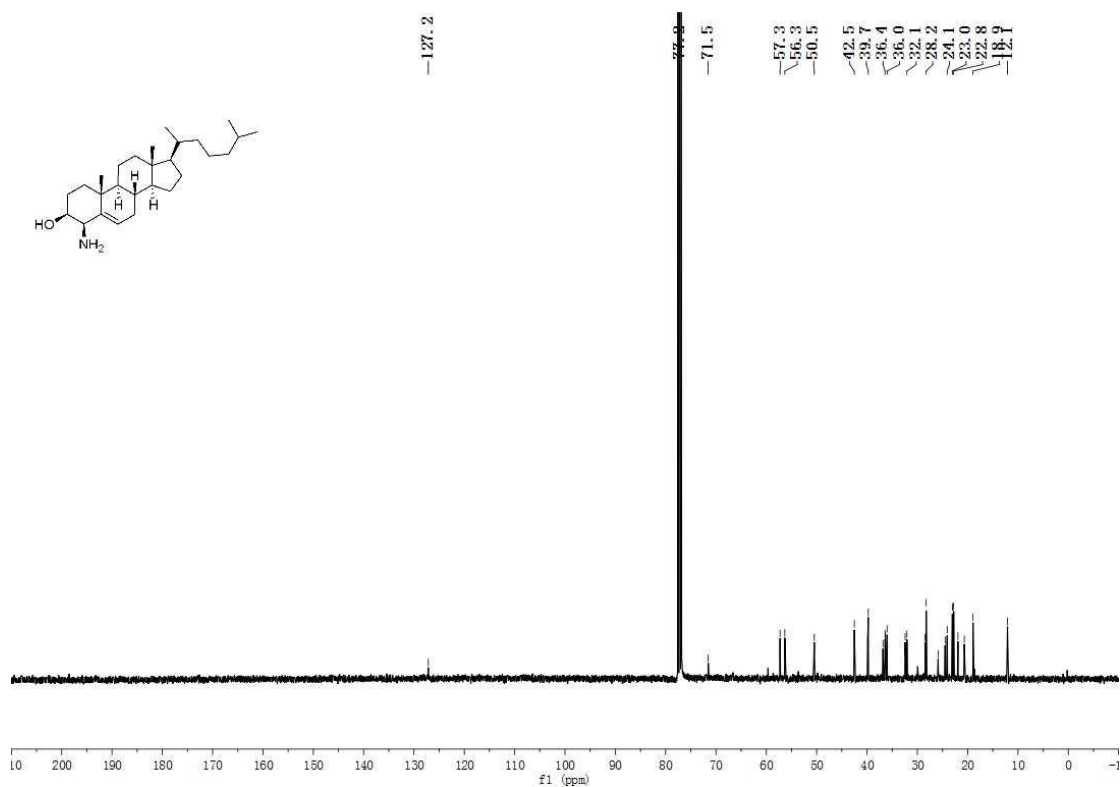

**Figure S51.**  $^{13}\text{C}$  NMR spectrum of **7a** (CDCl<sub>3</sub>, 100 MHz)

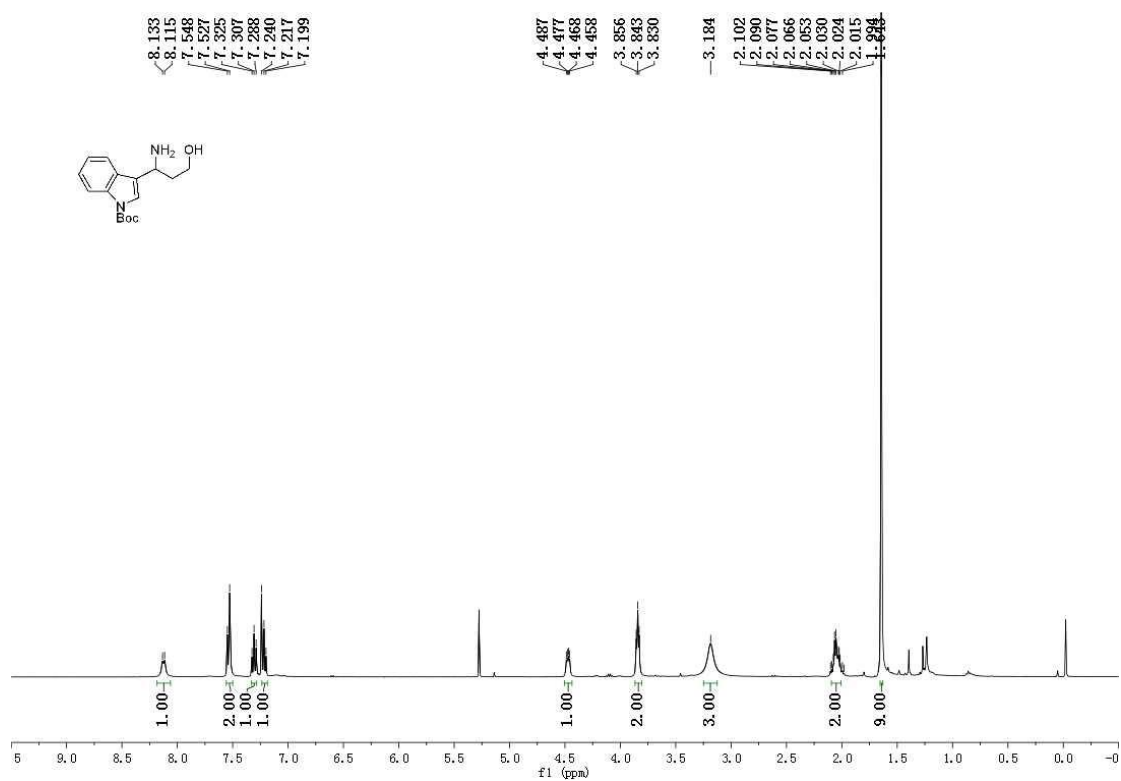

**Figure S52.**  $^1\text{H}$  NMR spectrum of **7b** (CDCl<sub>3</sub>, 400 MHz)

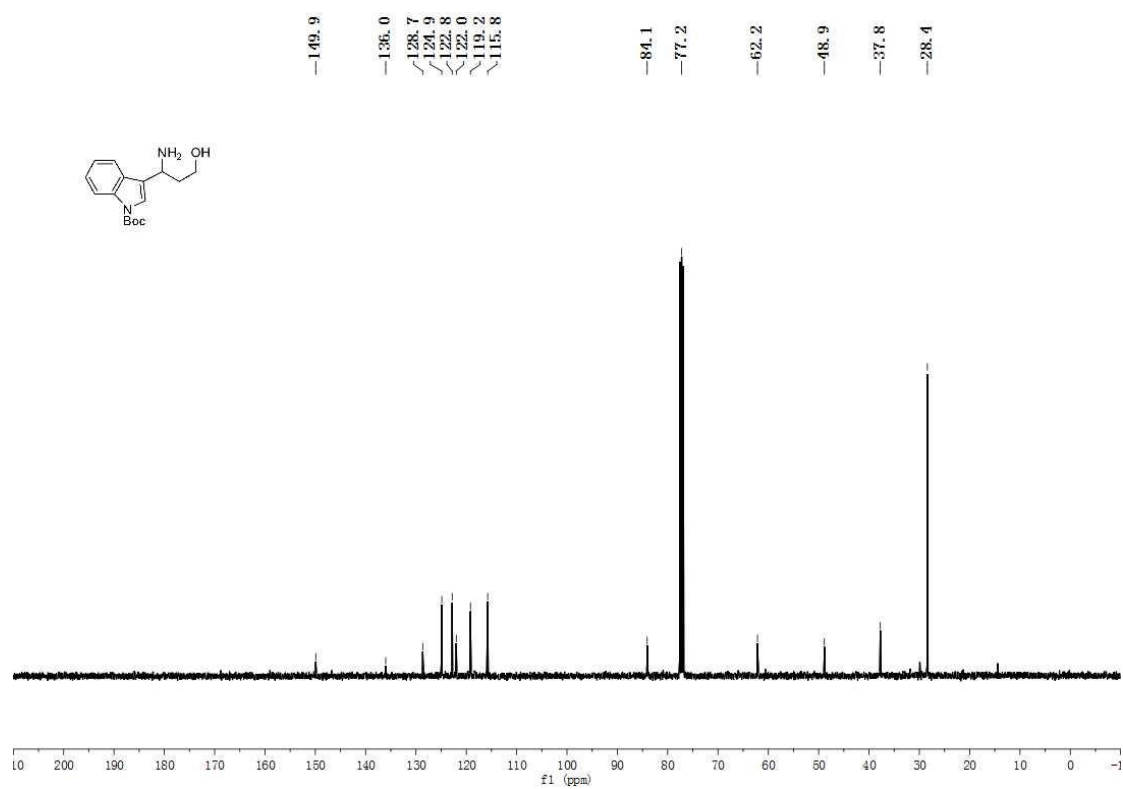

**Figure S53.** <sup>13</sup>C NMR spectrum of **7b** (CDCl<sub>3</sub>, 100 MHz)
